# Supplementary material for: Empirical observations of the spawning migration of European eels: The long and dangerous road to the Sargasso Sea
Source: PubMed Central journal article supplement — Sci Adv. 2016 Sep 5;2(10):e1501694. doi: 10.1126/sciadv.1501694 (PMC5052013; doi:10.1126/sciadv.1501694), 2016-09-05
Supplement: 1501694_SM.pdf [file 1501694_SM.pdf]

## Supplementary Materials for

### Empirical observations of the spawning migration of European eels: The long and dangerous road to the Sargasso Sea

David Righton, Håkan Westerberg, Eric Feunteun, Finn Økland, Patrick Gargan, Elsa Amilhat, Julian Metcalfe, Javier Lobon-Cervia, Niklas Sjöberg, Janek Simon, Anthony Acou, Marisa Vedor, Alan Walker, Thomas Trancart, Uwe Brämick, Kim Aarestrup

Published 5 October 2016, *Sci. Adv.* **2**, e1501694 (2016)

DOI: 10.1126/sciadv.1501694

#### The PDF file includes:

- fig. S1. Pop-off or recovery positions of DSTs and PSATs.
- fig. S2a. Migration and end points of eels released from the Baltic Sea.
- fig. S2b. Migration and end points of eels released from Ireland.
- fig. S2c. Migration and end points of eels released from western France.
- fig. S2d. Migration and end points of eels released from Germany.
- fig. S2e. Migration and end points of eels released from the Mediterranean coast.
- fig. S3a. Example of an eel (PSAT #89310, released from Ireland) being preyed upon by a (assumed) pelagic fish.
- fig. S3b. Example of an eel (PSAT #49644, released from Ireland) being preyed upon by an endothermic fish.
- fig. S3c. Example of an eel (PSAT #101445, released from Ireland) being preyed upon by a coastal pelagic predator.
- fig. S3d. Example of an eel (PSAT #83156, released from Ireland) being preyed upon by a deep living fish.
- fig. S3e. Example of an eel (PSAT #49559, released from Ireland) being preyed upon by a marine mammal.
- fig. S3f. Example of an eel (PSAT #133984, released from southern France) being preyed upon by an unknown endotherm.
- fig. S4. Example of daytime thermal experience of eels during migration along the Norwegian trench/deep in the Norwegian Sea.
- fig. S5. Depth and temperature time series from PSAT #83140.
- fig. S6. Relative frequency distribution of swimming speed.
- fig. S7. Electronic tag types and attachment technique.

- fig. S8. Principle and validation of behavioral geolocation.
- fig. S9. Analysis of the total number of length-measured European eel *leptocephali* in the ICES database.
- table S1. Details of reconstructed migrations of eels that reached the ocean.
- table S2. Assessment of effect of tag and release country on speed, migration duration, and migration distance of eels.
- table S3. The speed of European eels.
- table S4a. The fate of eels that reached oceanic waters.
- table S4b. The fate of all released eels for which data sets were recovered.
- table S5. Summary of literature used to assess escapement date.
- table S6. Silver eel escapement timing in the River Gudena, Denmark.
- table S7. Release locations and numbers of eels released during the study.
- table S8a. Summary metrics of tagged eels.
- table S8b. Summary metrics of eels for which migratory data were recovered ( $\pm 1$  SD).
- Legend for table S9

**Other Supplementary Material for this manuscript includes the following:**  
 (available at [advances.sciencemag.org/cgi/content/full/2/10/e1501694/DC1](https://advances.sciencemag.org/cgi/content/full/2/10/e1501694/DC1))

- table S9 (Microsoft Excel format). Metrics of all eels tagged ( $n = 707$ ).

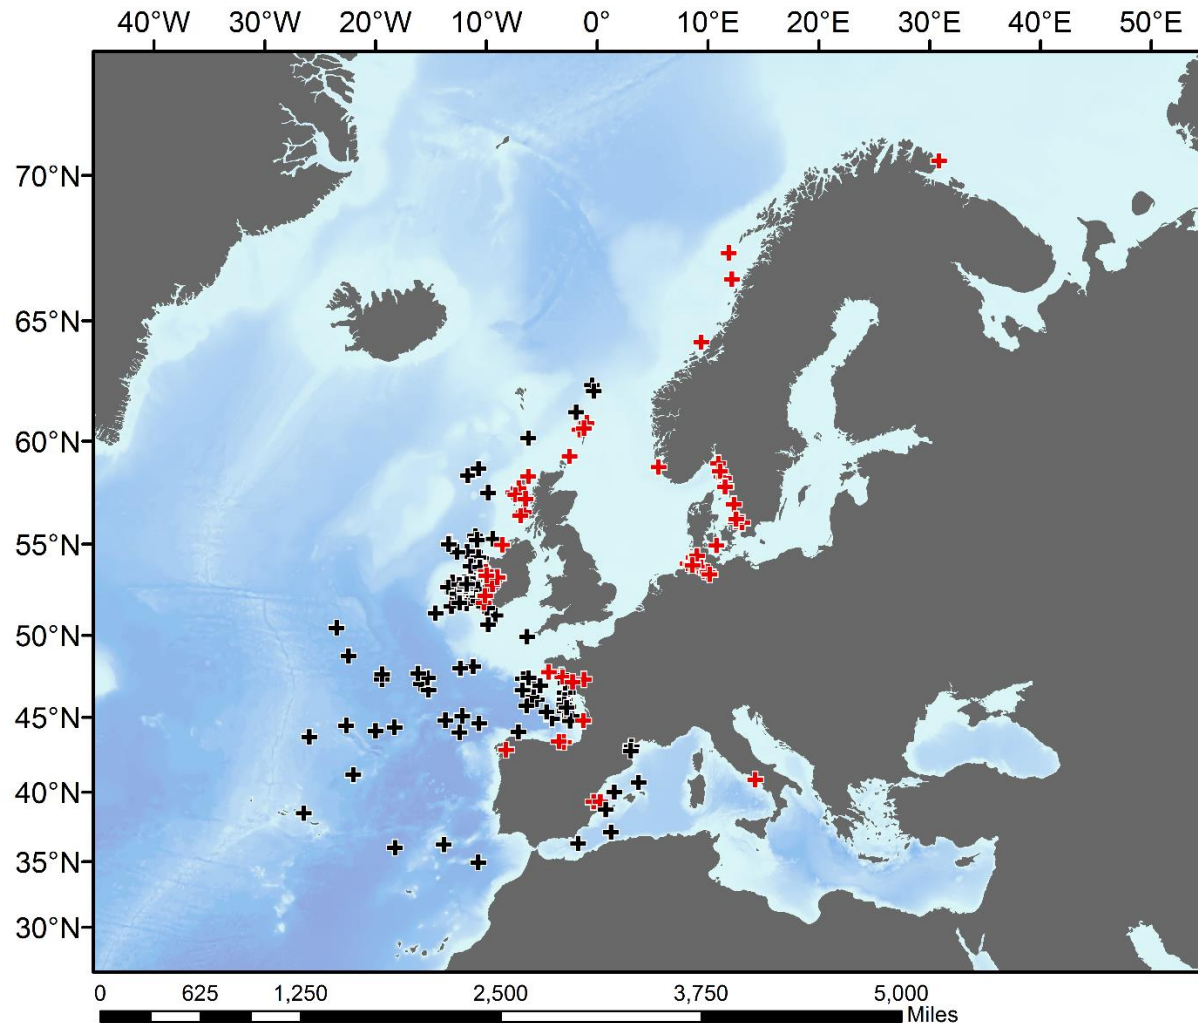

**fig. S1.** DSTs recovery positions are shown by red crosses, whereas PSAT pop-off positions are shown by black crosses. Pop-off or recovery positions of tags do not always correspond to the terminal positions of eels that carried the tags shown separately in fig. S2 because they are unadjusted for surface drift after premature release or displacement due to predation.

**fig. S2a.** Migration and end points of eels released from the Baltic Sea. Points joined by lines and ending in black crosses are reconstructions of the migrations of eels that escaped the coastal margins (n=23) before tag pop-up or predation. Coloured crosses not joined by lines to the release location show the reporting positions of tags that released prematurely, or were attached to eels that were eaten by predators (n=13). These data did not provide any information about migratory capability of eels and are only included here for completeness. Note that the pop-up positions of tags attached to eels that suffered early predation (i.e. before the terminal position of the eel could be determined by hydrographic data) were often taken or drifted a considerable distance offshore before the tags reported. See citation (18) for further details.

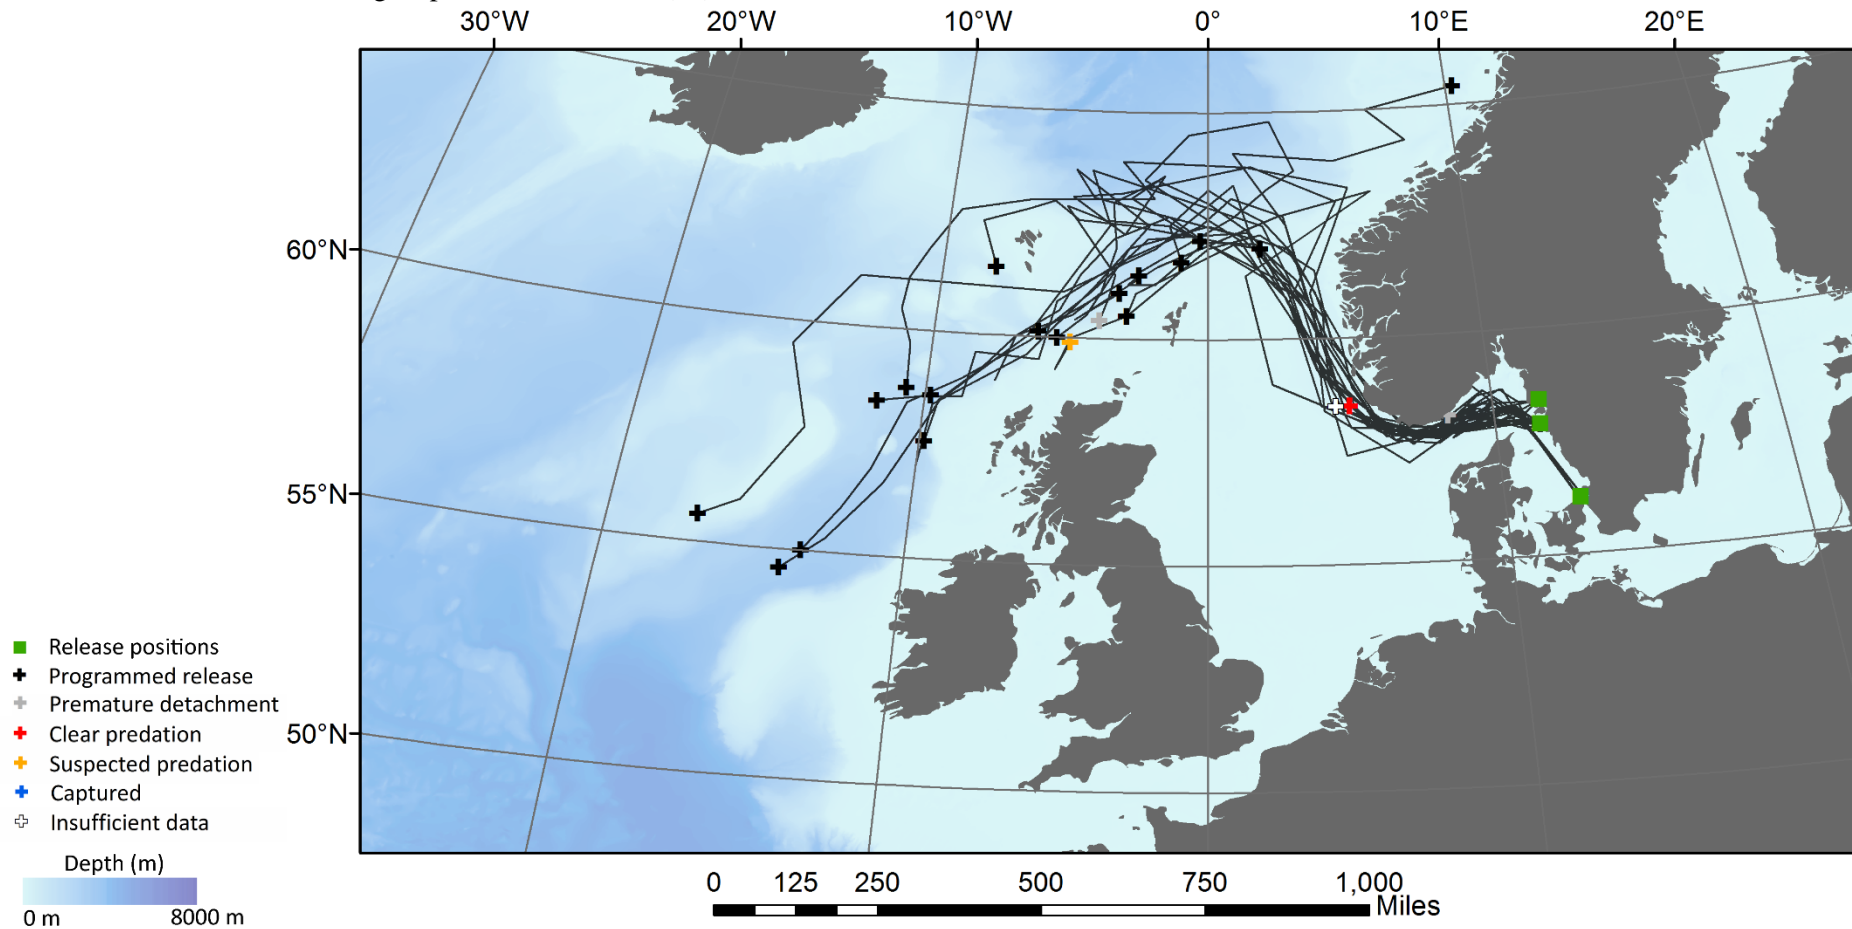

**fig. S2b.** Migration and end points of eels released from Ireland. Shading of sea areas shows bathymetry. Points joined by lines and ending in black crosses are reconstructions of the migrations of eels that escaped the coastal margins before tag pop-up or predation (n=44). Coloured crosses not joined by lines to the release location show the reporting positions of tags that released prematurely, or were carried by eels that suffered predation (n=80). These data did not provide any information about migratory capability of eels and are only included here for completeness. Note that the pop-up positions of tags attached to eels that suffered early predation (i.e. before the terminal position of the eel could be determined by hydrographic data) were often taken or drifted a considerable distance offshore before the tags reported.

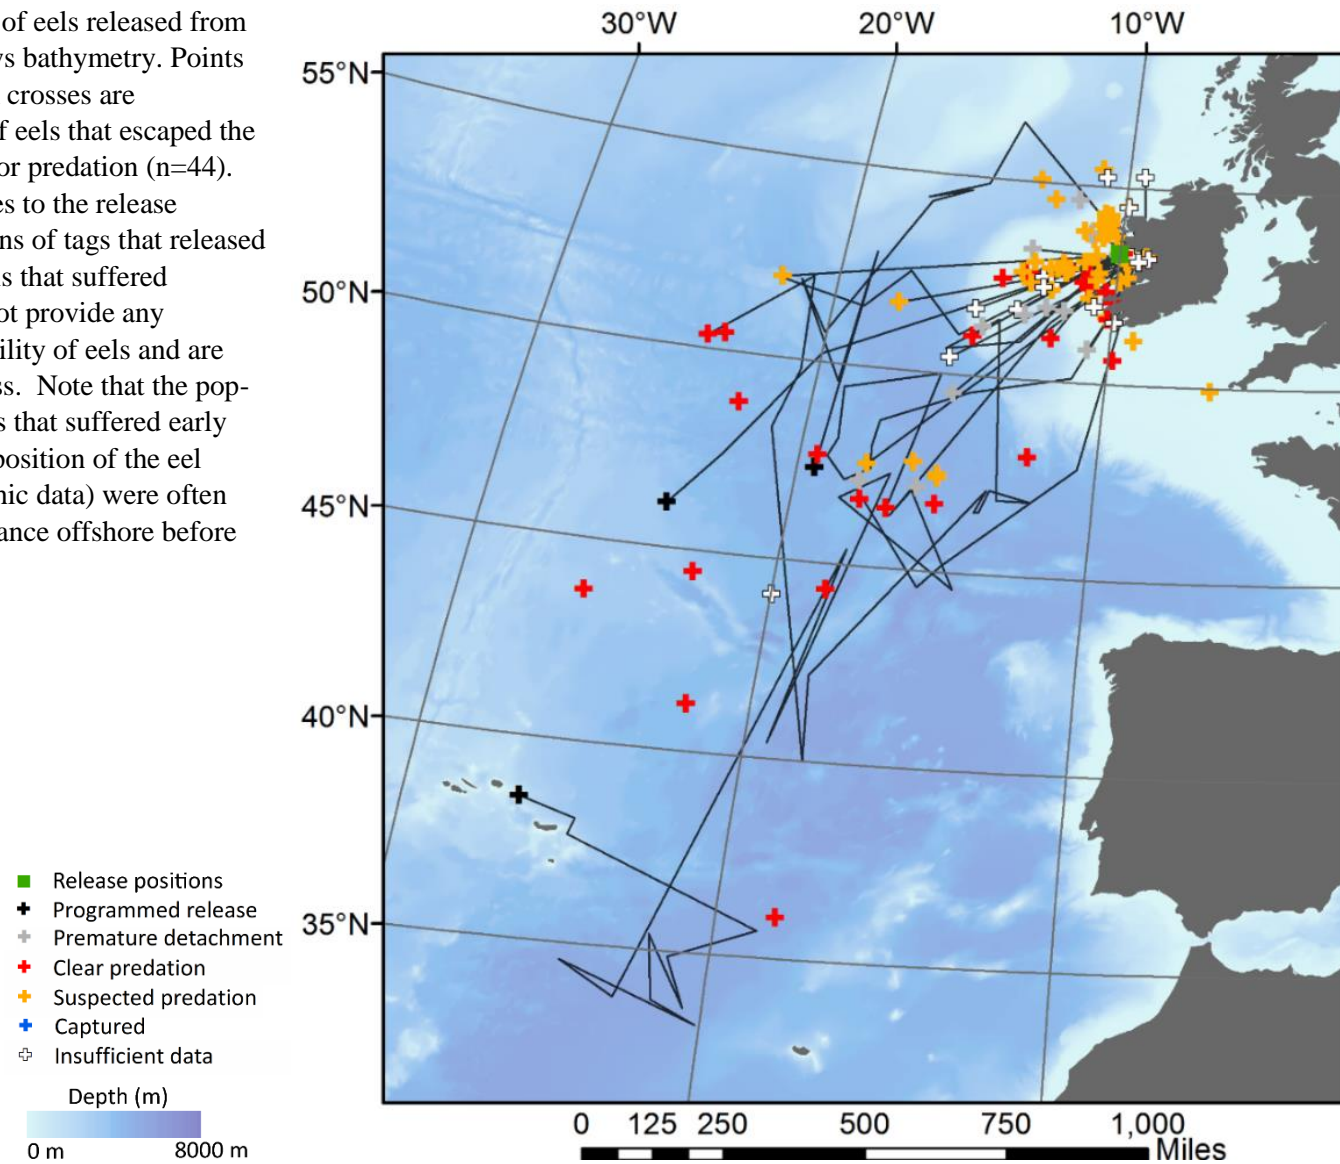

**fig. S2c.** Migration and end points of eels released from western France. Points joined by lines and ending in black crosses are reconstructions of the migrations of eels that escaped the coastal margins (n=7) before tag pop-up or predation. Coloured crosses not joined by lines to the release location show the reporting positions of tags that released prematurely, or were carried by eels that suffered predation (n=34). These data did not provide any information about migratory capability of eels and are only included here for completeness. Note that the pop-up positions of tags attached to eels that suffered early predation (i.e. before the terminal position of the eel could be determined by hydrographic data) were often taken or drifted a considerable distance offshore before they reported.

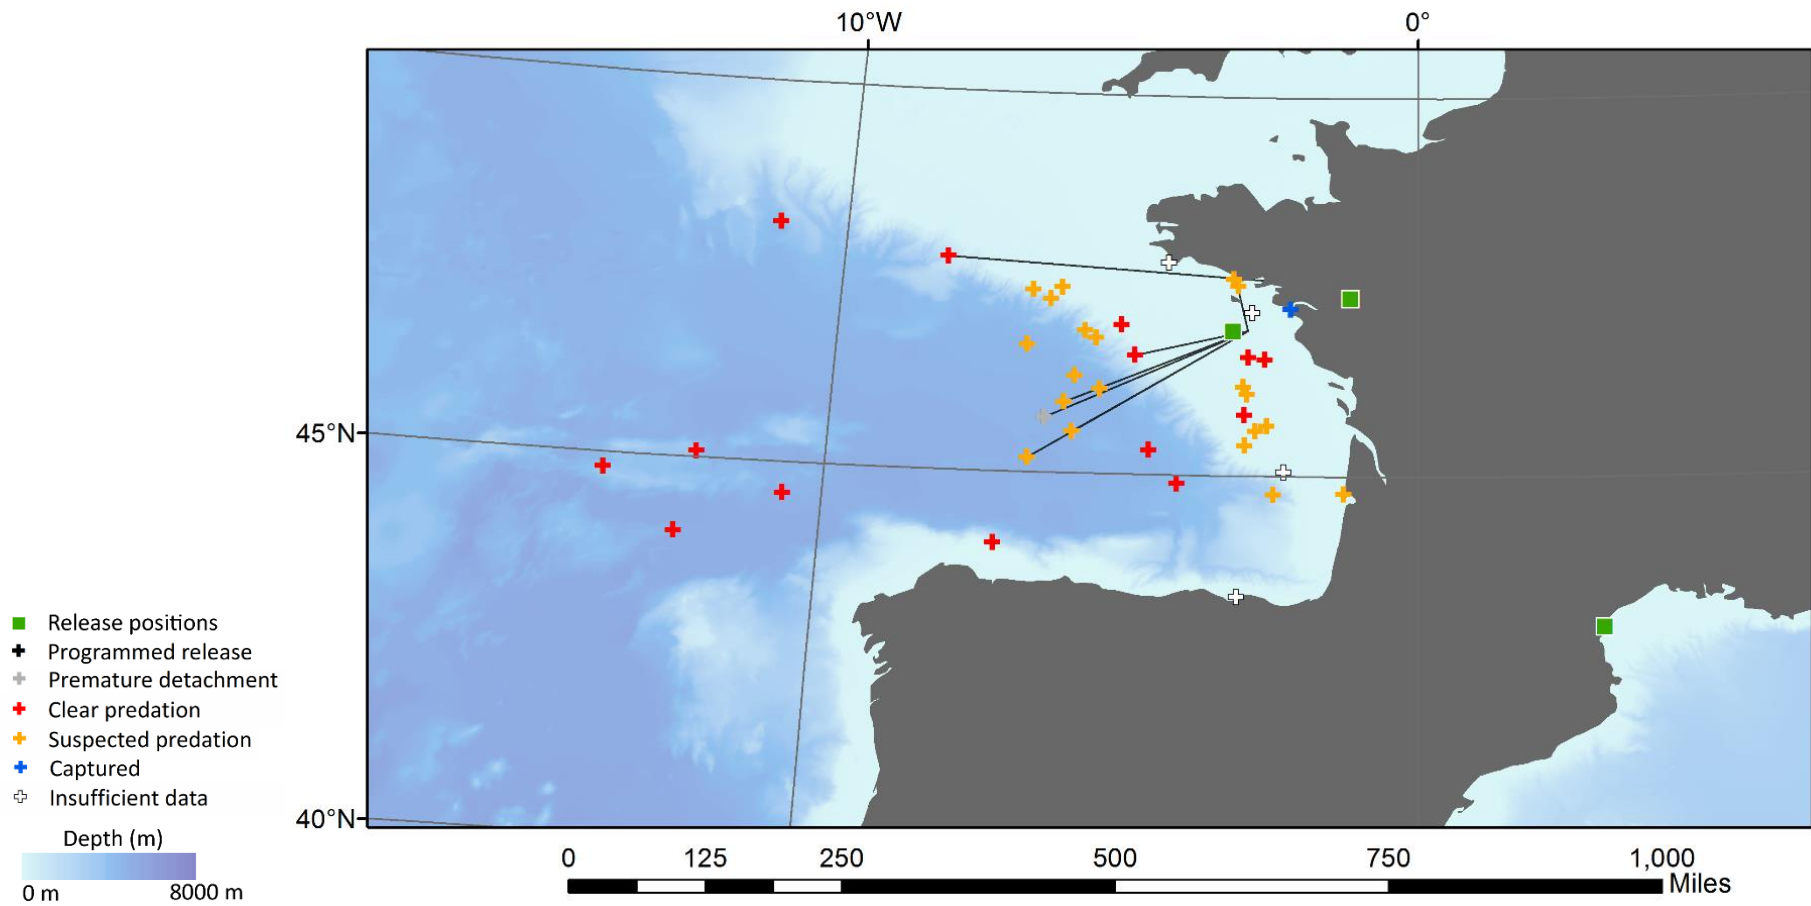

**fig. S2d.** Migration and end points of eels released from Germany. Points joined by lines and ending in black crosses are reconstructions of the migrations of eels that escaped the coastal margins (n=5) before tag pop-up or predation. Coloured crosses not joined by lines to the release location show the reporting positions of tags that released prematurely, or were carried by eels that suffered predation (n=2). These data did not provide any information about migratory capability of eels and are only included here for completeness. Note that the pop-up positions of tags attached to eels that suffered early predation (i.e. before the terminal position of the eel could be determined by hydrographic data) were often taken a considerable distance offshore before the tags reported.

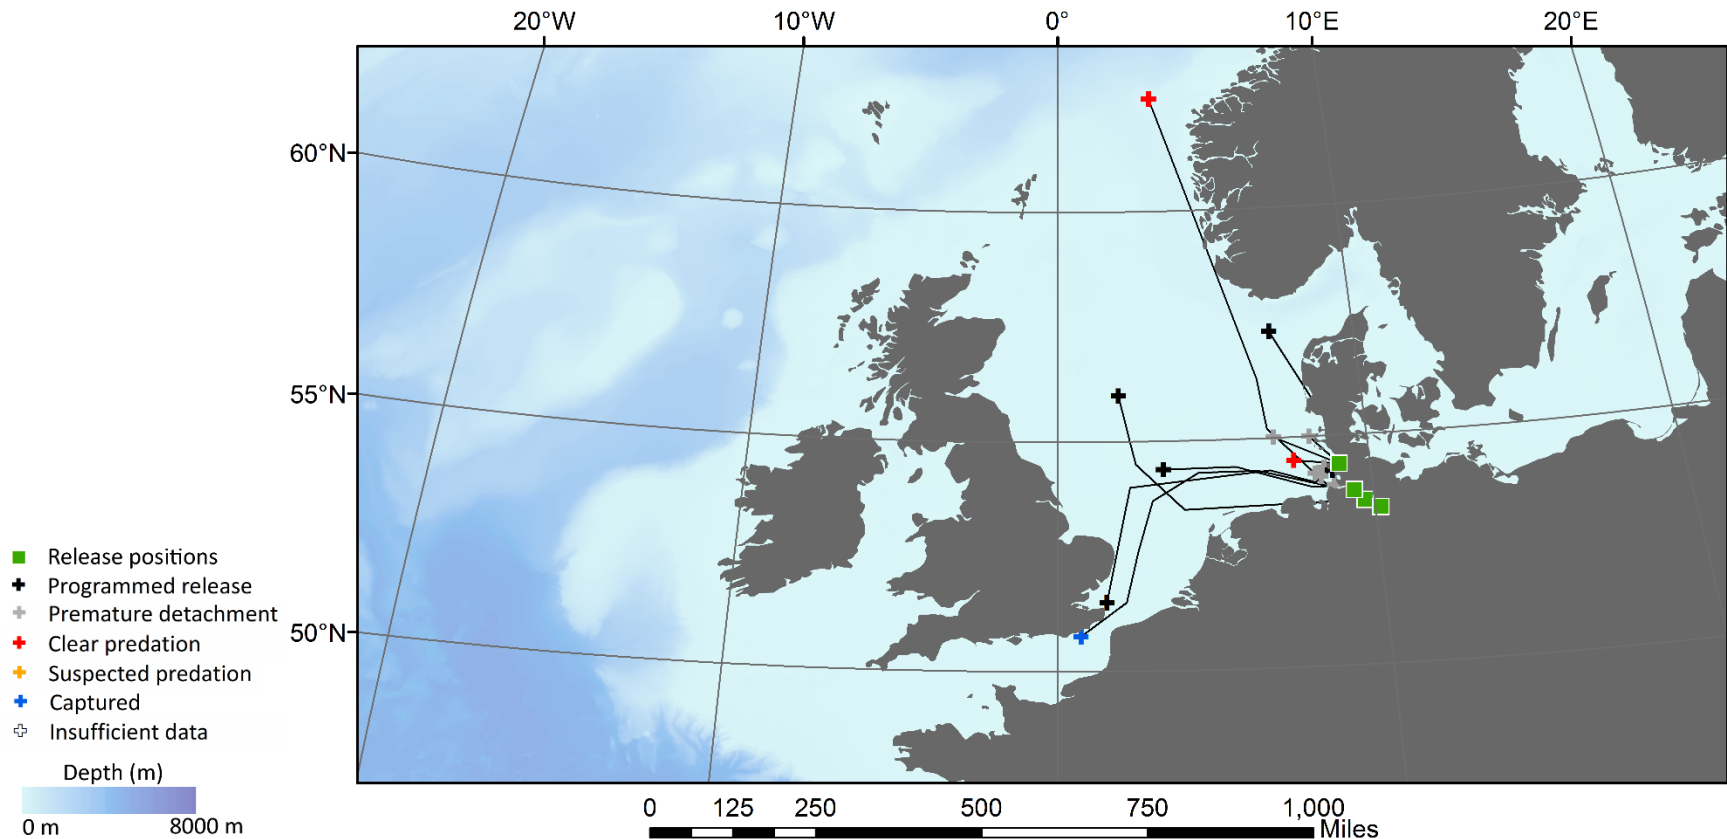

**fig. S2e.** Migration and end points of eels released from the Mediterranean coast. Points joined by lines and ending in black crosses are reconstructions of the migrations of eels that escaped the coastal margins (n=8) before tag pop-up or predation. See citation (84) for more details.

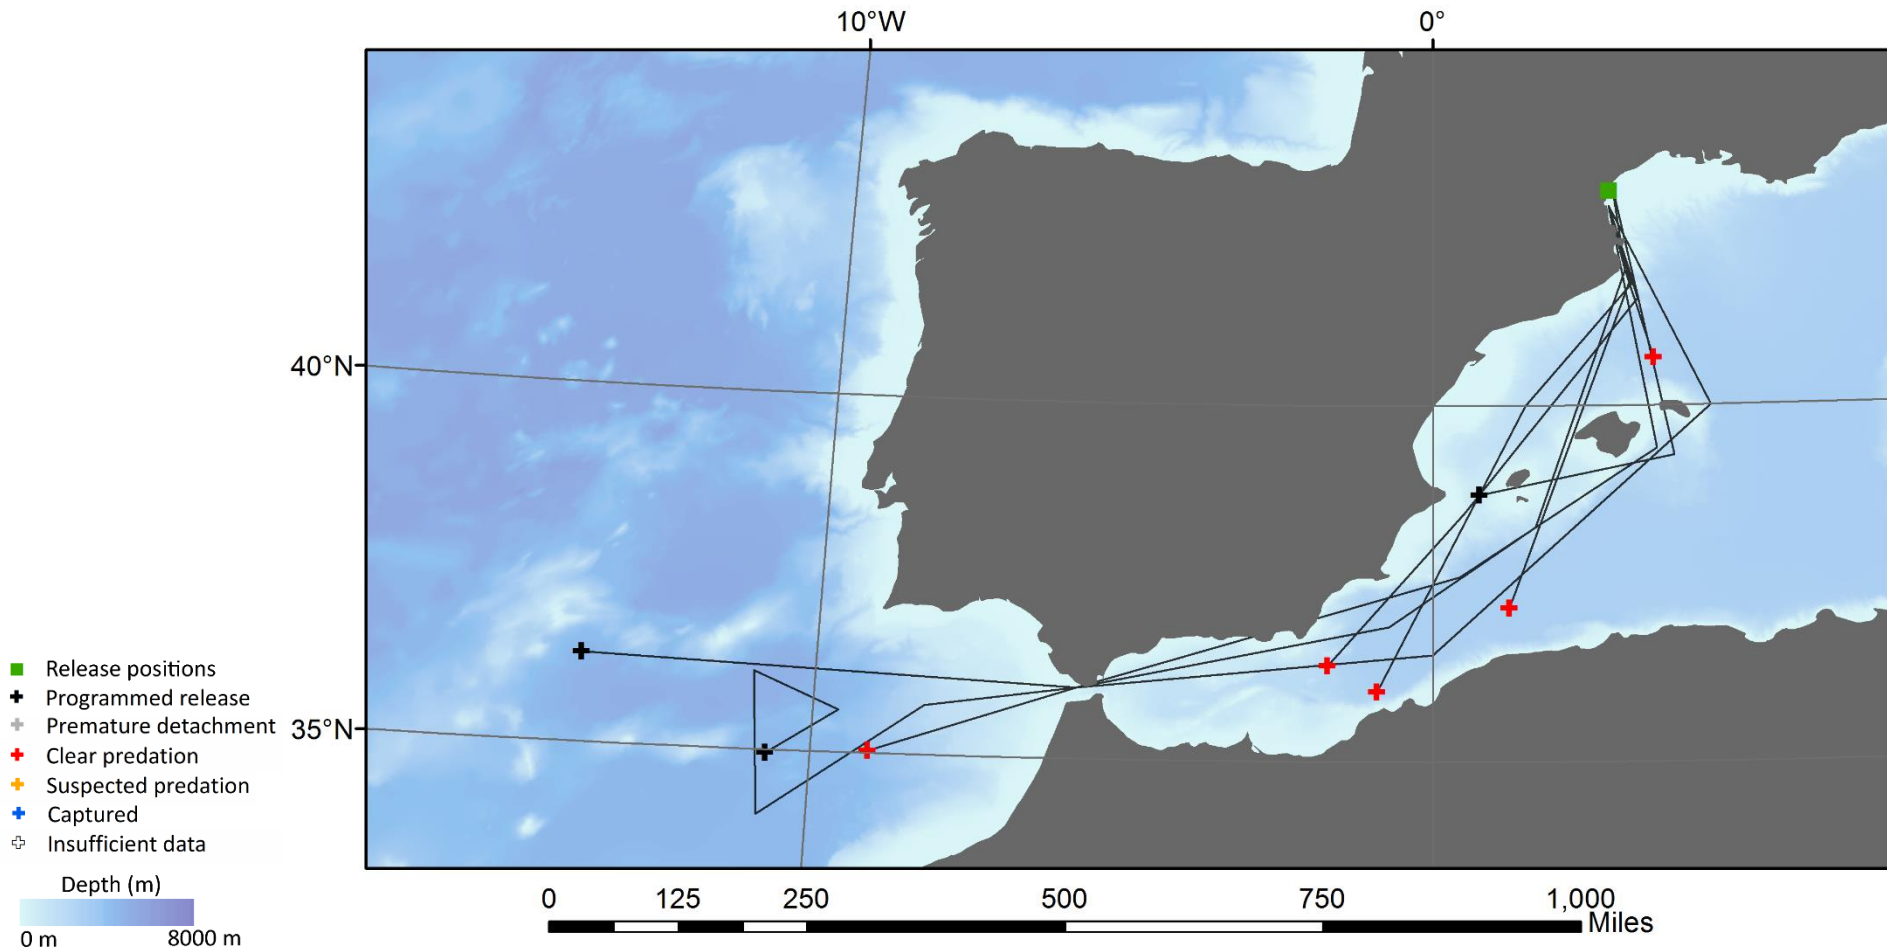



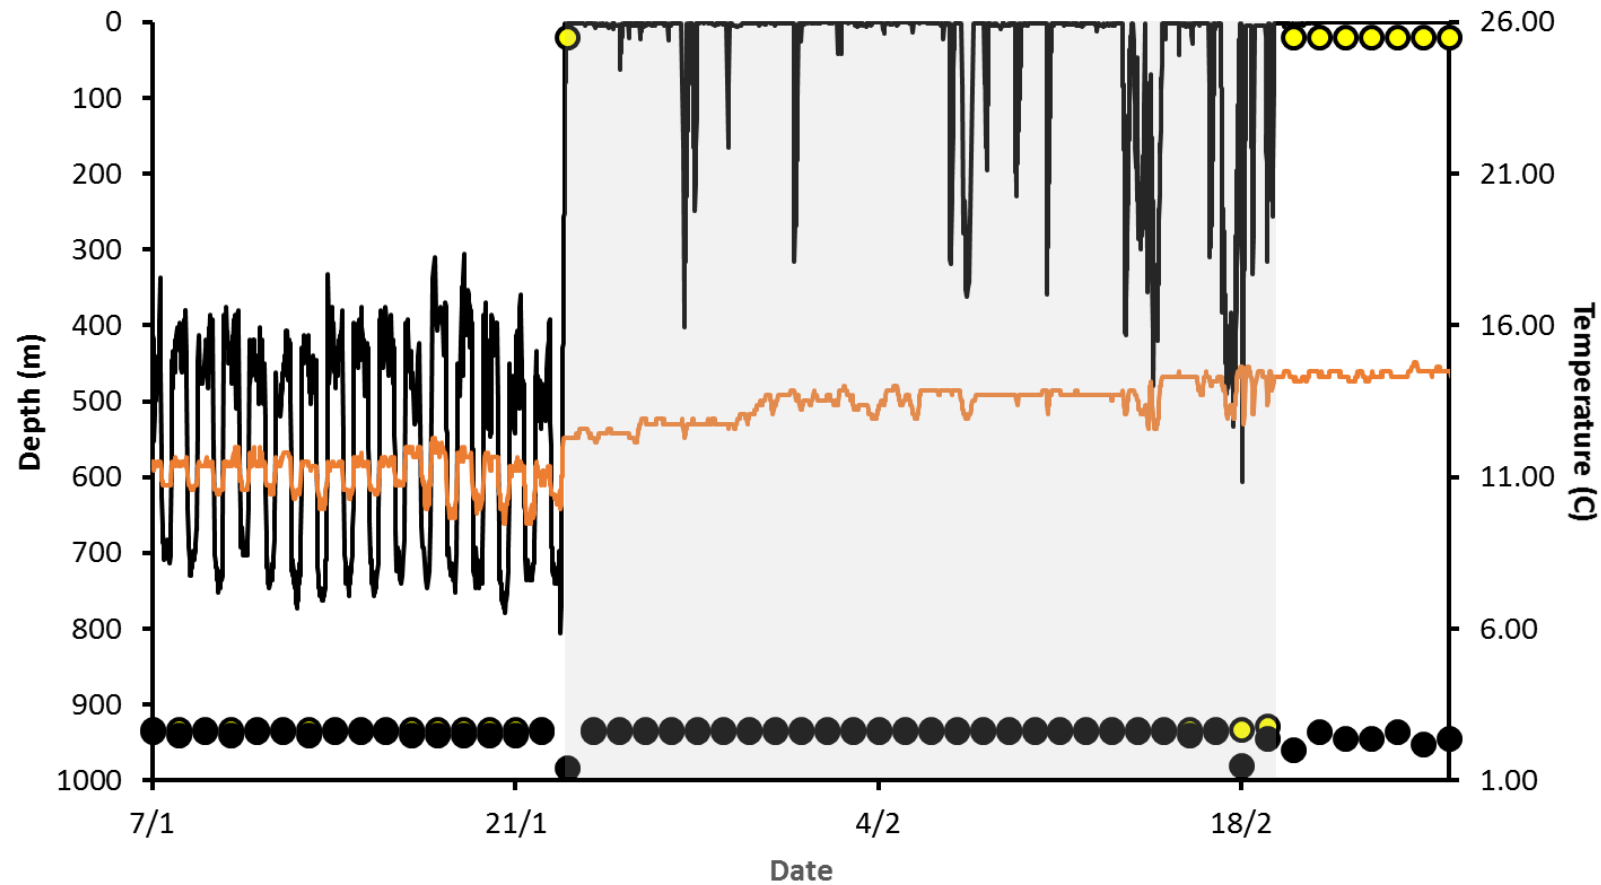

**fig. S3a.** Example of an eel (PSAT #89310, released from Ireland) being preyed upon by a (assumed) pelagic fish. The eel started a period of normal diurnal migration cycling between 300 m and 700 m when it was eaten and taken to the surface. There, the tag was swallowed with the eel and the depth record shows sporadic surface oriented dive behaviour. Temperature recorded by the tag does not rise above that expected for surface waters. Circular symbols show the daily light data recorded by the tag (values ranged from 1 to 255, and have been proportionally rescaled to fit the temperature axis). Black-filled symbols indicate minimum light values, while yellow indicate maxima.

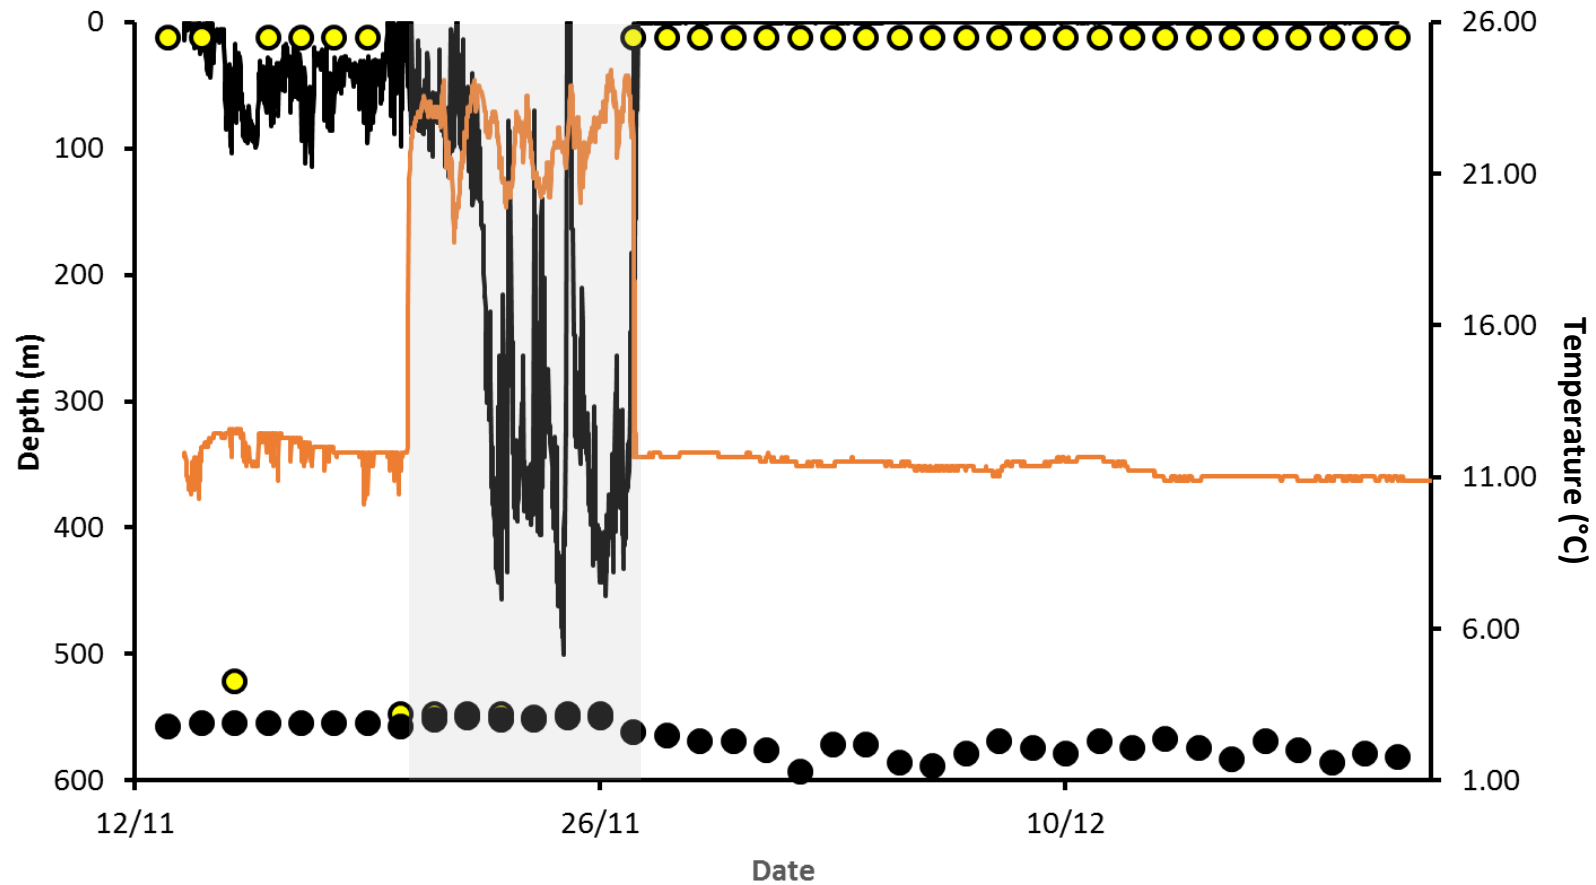

**fig. S3b.** Example of an eel (PSAT #49644, released from Ireland) being preyed upon by an endothermic fish. The predation event occurred away from the surface and the tag subsequently remained most of the time too deep for registration of daylight. However, no light was registered by the tag when at the surface, and the record of temperature is consistent with the stomach temperature of a lamnid shark (elevated by approximately 10°C above ambient). Circular symbols show the daily light data recorded by the tag (values ranged from 1 to 255, and have been proportionally rescaled to fit the temperature axis). Black-filled symbols indicate minimum light values, while yellow indicate maxima.

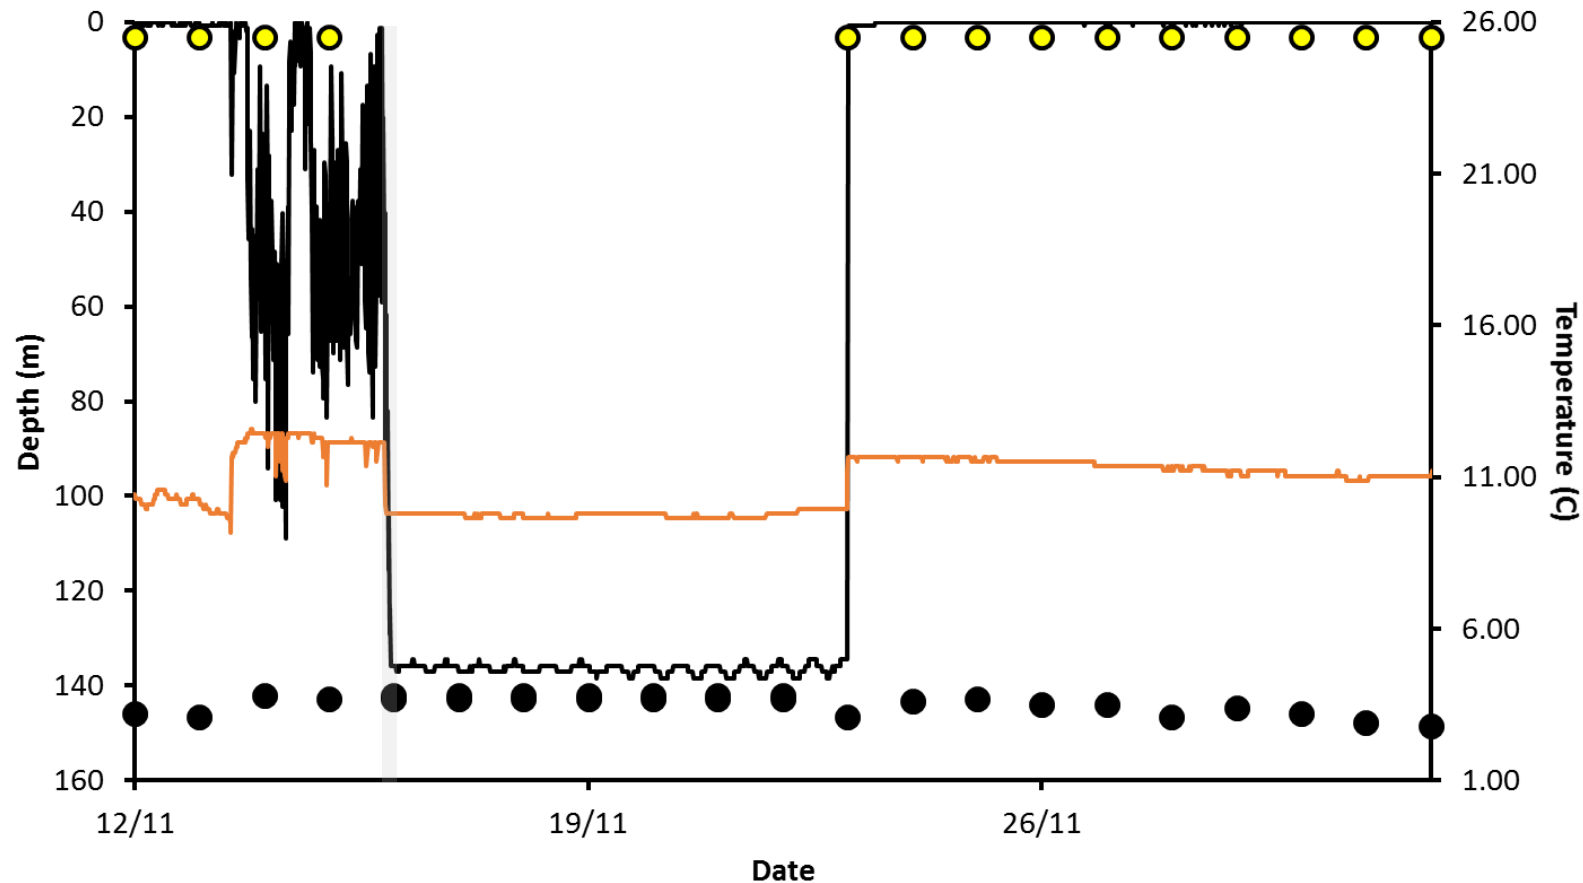

**fig. S3c.** Example of an eel (PSAT #101445, released from Ireland) being preyed upon by a coastal pelagic predator. The tag pressure sensor recorded a sudden drop to the bottom during normal coastal escape behaviour. This was followed by 10 d at the same depth with a tidal pressure variation, indicating that the tag was resting on the seabed. The tag rose to the surface after the failsafe period (10 d), suggesting that the tag was still attached to the eel when it was resting at the seabed (i.e. the eel was killed and only partially eaten during the predation event). Circular symbols show the daily light data recorded by the tag (values ranged from 1 to 255, and have been proportionally rescaled to fit the temperature axis). Black-filled symbols indicate minimum light values, while yellow indicate maxima.

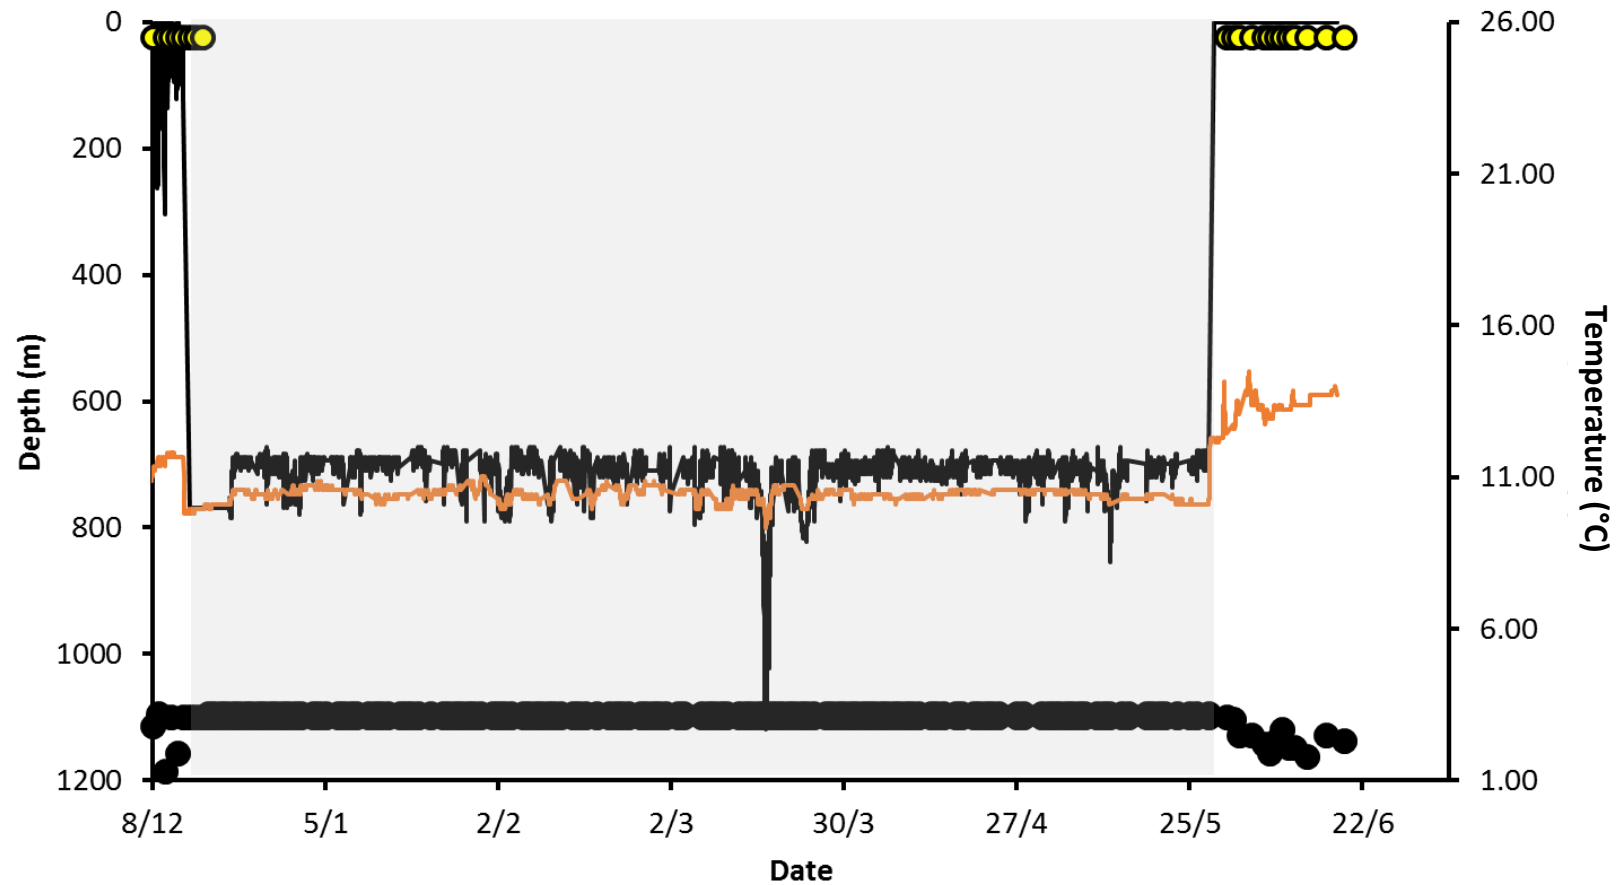

**fig. S3d.** Example of an eel (PSAT #83156, released from Ireland) being preyed upon by a deep living fish. After a period with “normal” eel behaviour the eel dropped to the bottom where it remains for 8 d. After this the tag stayed at an average depth of 700 m with irregular dives up and down for a period of six months. The maximum recorded depth was 1120 m. Circular symbols show the daily light data recorded by the tag (values ranged from 1 to 255, and have been proportionally rescaled to fit the temperature axis). Black-filled symbols indicate minimum light values, while yellow indicate maxima.

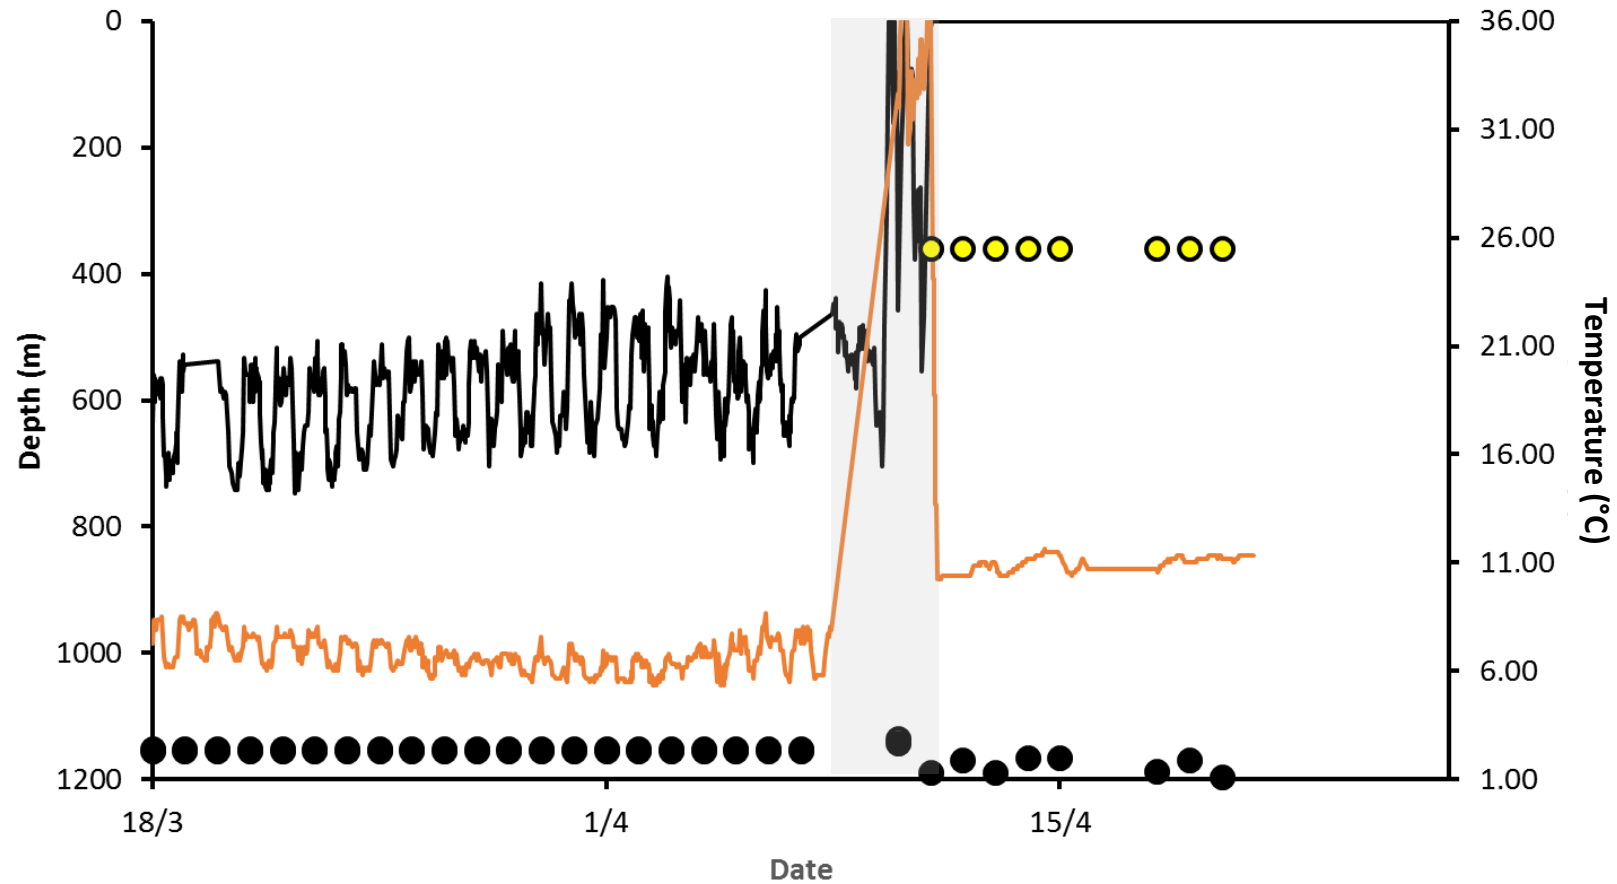

**fig. S3e.** Example of an eel (PSAT #49559, released from Ireland) being preyed upon by a marine mammal. Outside the shelf and before the predation events the diurnal vertical migrations and range of the eel were consistent with previous observations of ocean-migrating eels. There was a sudden rise in temperature to  $>35^{\circ}\text{C}$  and the tag recorded a reduction in depth to the surface. The predator showed bouts of deep dives with inter-surface intervals. The median duration of such dives was 11–12 min and the interval at the surface between dives varied between 5 and 7 min. Circular symbols show the daily light data recorded by the tag (values ranged from 1 to 255, and have been proportionally rescaled to fit the temperature axis). Black-filled symbols indicate minimum light values, while yellow indicate maxima.

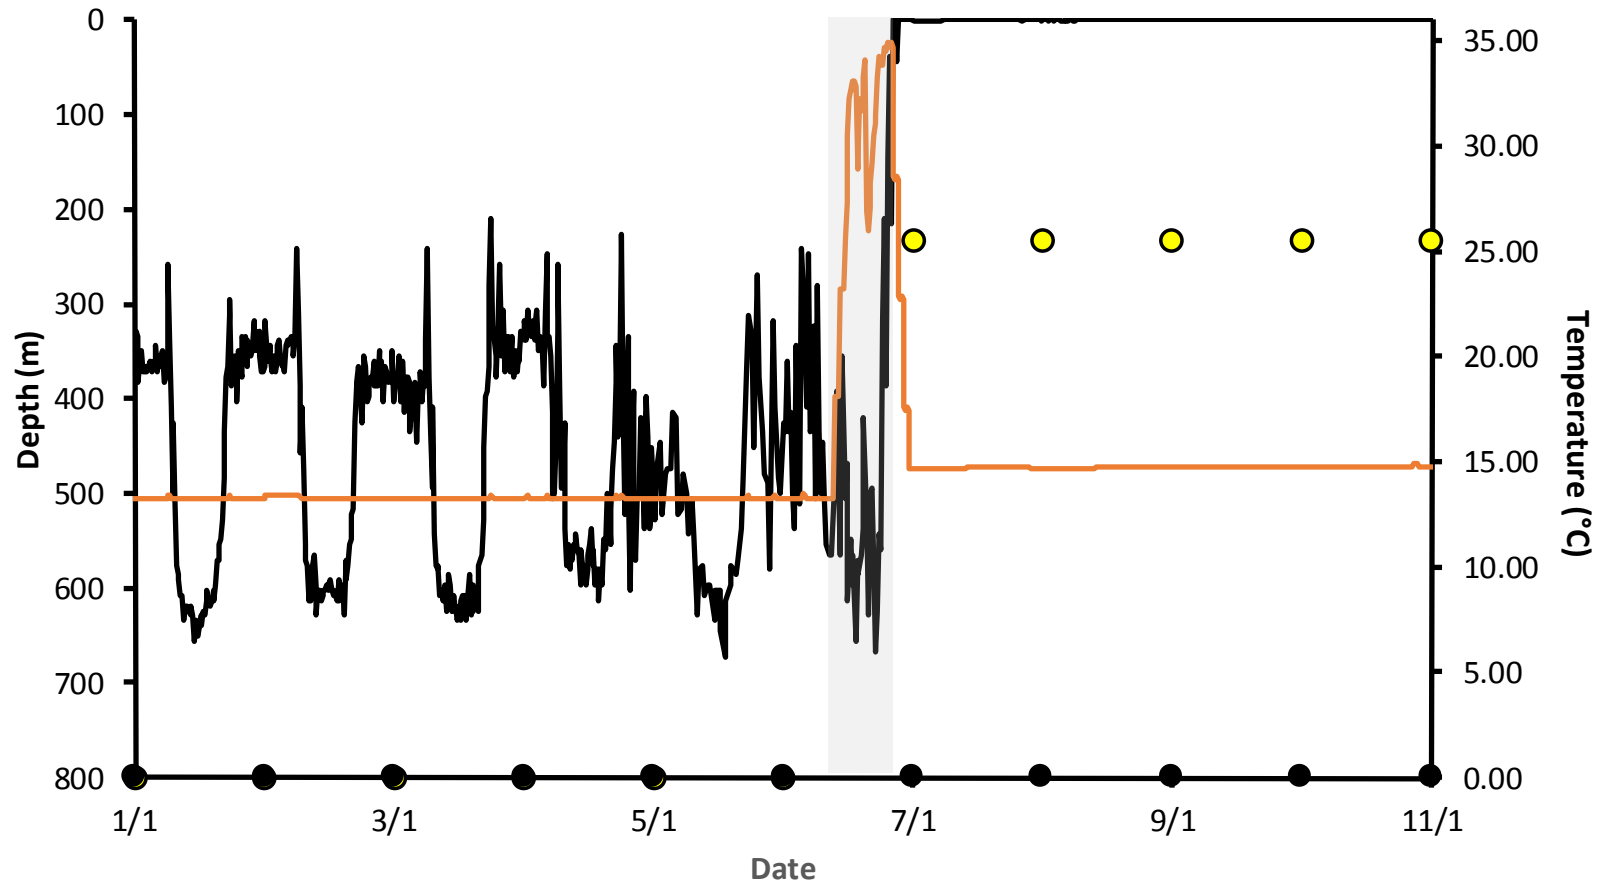

**fig. S3f.** Example of an eel (PSAT #133984, released from southern France) being preyed upon by an unknown endotherm. The eel was behaving normally until a sudden change in dive pattern and an increase in temperature to above 30°C. However, after predation, the predator remained at depth for approximately 12 h, ruling out predation by a marine mammal. The maximum recorded body temperature of the predator was 35°C. Circular symbols show the daily light data recorded by the tag (values ranged from 1 to 255, and have been proportionally rescaled to fit the temperature axis). Black-filled symbols indicate minimum light values, while yellow indicate maxima.

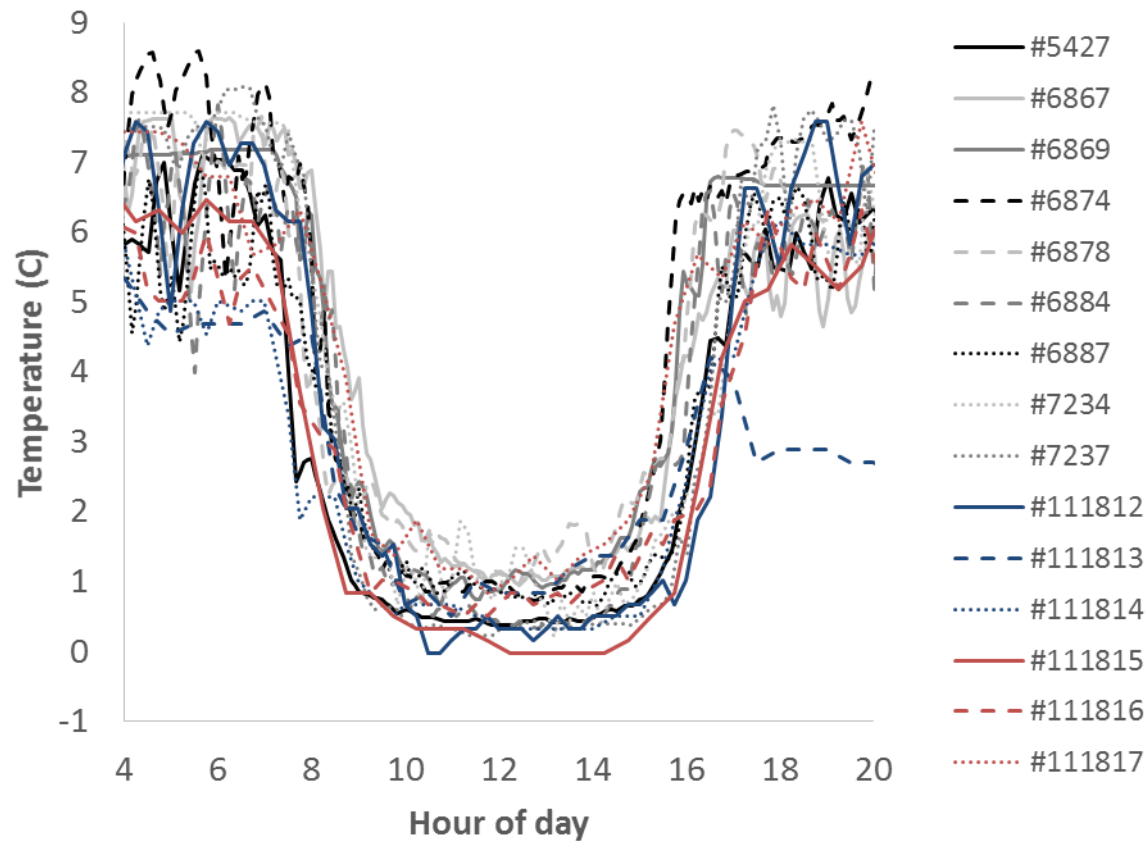

**fig. S4. Example of daytime thermal experience of eels during migration along the Norwegian trench/deep in the Norwegian.** Each line represents a day of temperature experience from a different individual. Grey and black lines are data from DST tagged fish, coloured lines are from PSAT tagged fish.

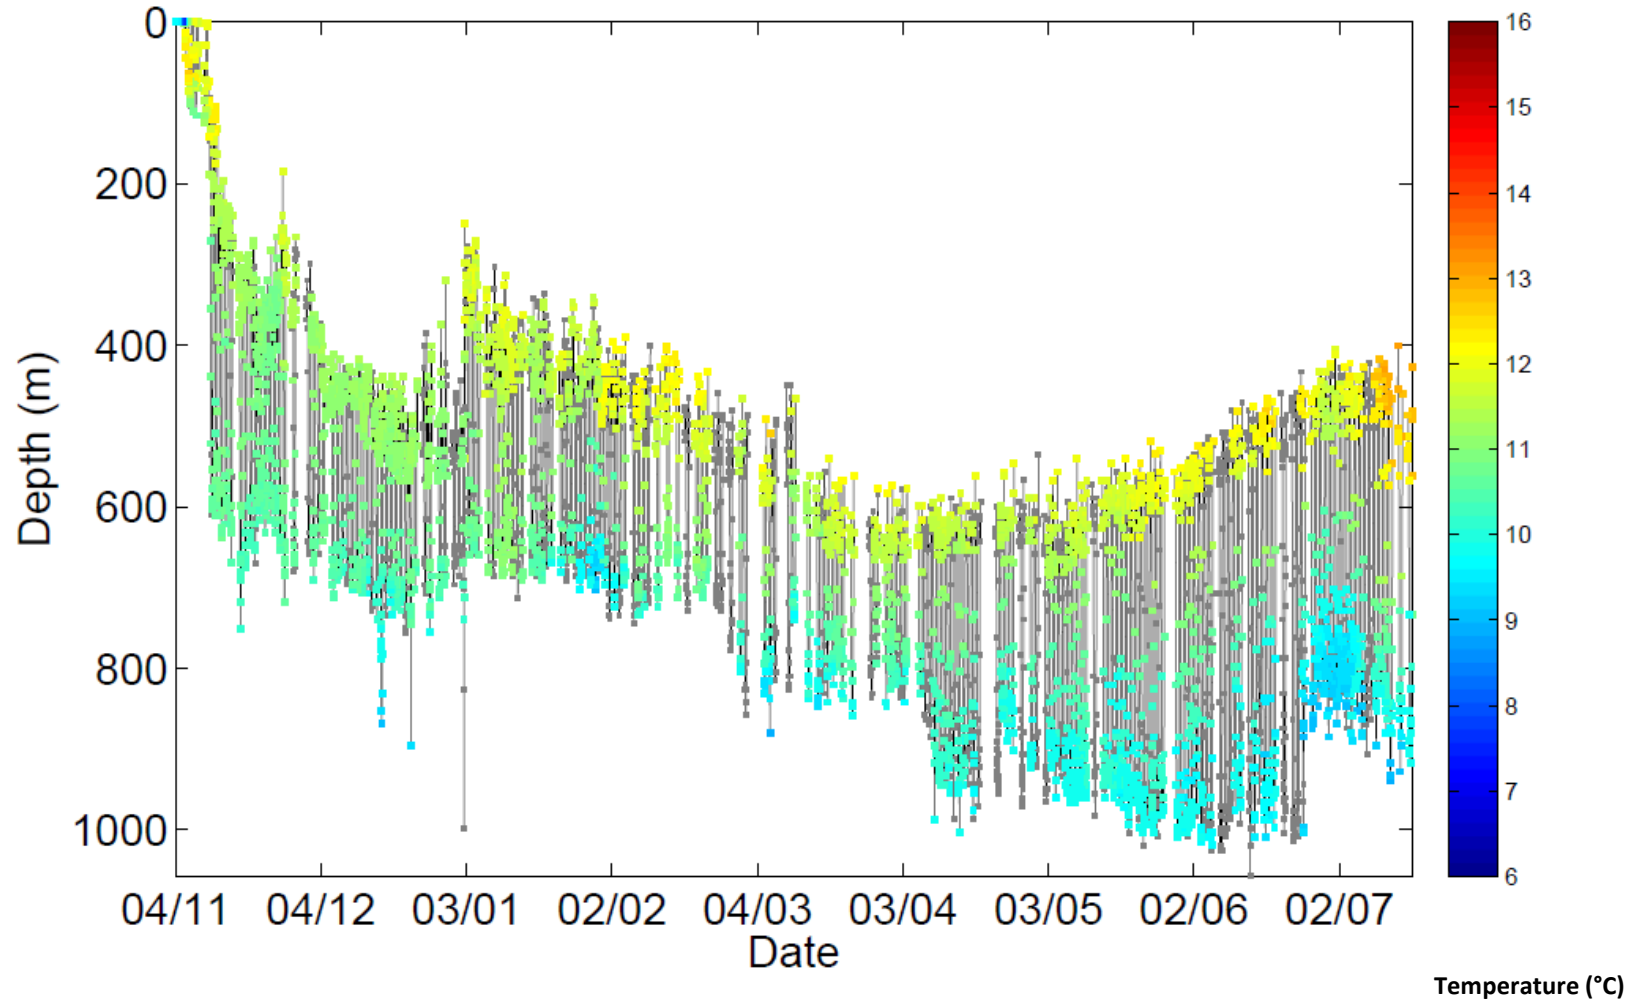

**fig. S5. Depth and temperature time series from PSAT #83140.** The tag remained attached to the eel for 276 d before detaching as programmed. The eel was released from Ireland in 2008, and the pop-up position was close to the Azores, at a surface temperature of 22°C. Depth data are coloured by temperature values.



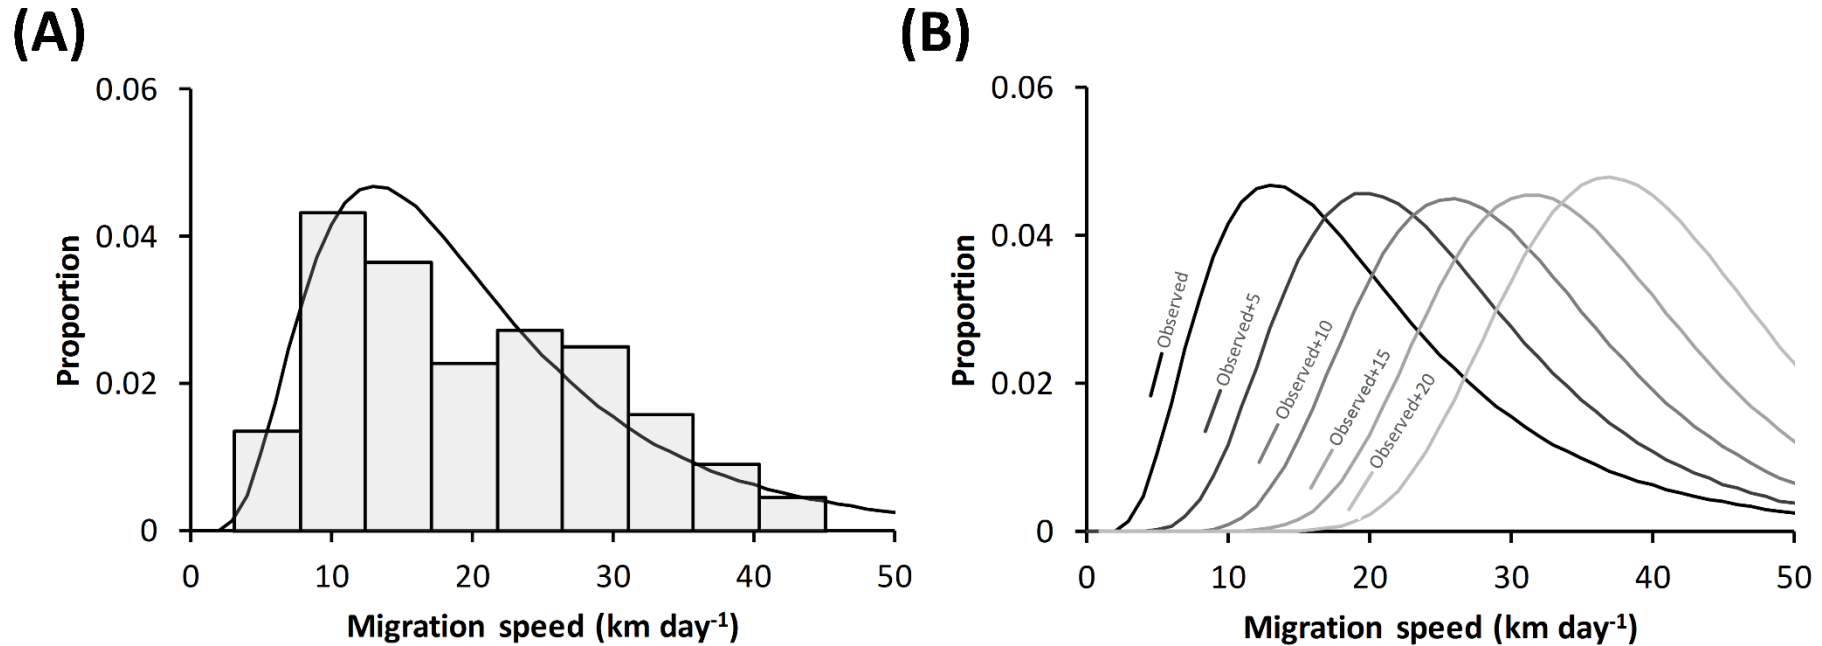

**fig. S6. Relative frequency distribution of swimming speed.** (a) observed migration speeds and the best fitting log-normal distribution; (b) example migration speed distributions used to calculate the proportion of eels able to arrive at the spawning area in the Sargasso Sea in time for peak spawning. The distributions were truncated at 52km day<sup>-1</sup>, which represents the expected daily swimming speed of an 80 cm long European eel swimming at 0.75 body lengths s<sup>-1</sup>. Truncated distributions were normalised prior to calculation of the proportion of successful arrivals.

(A)

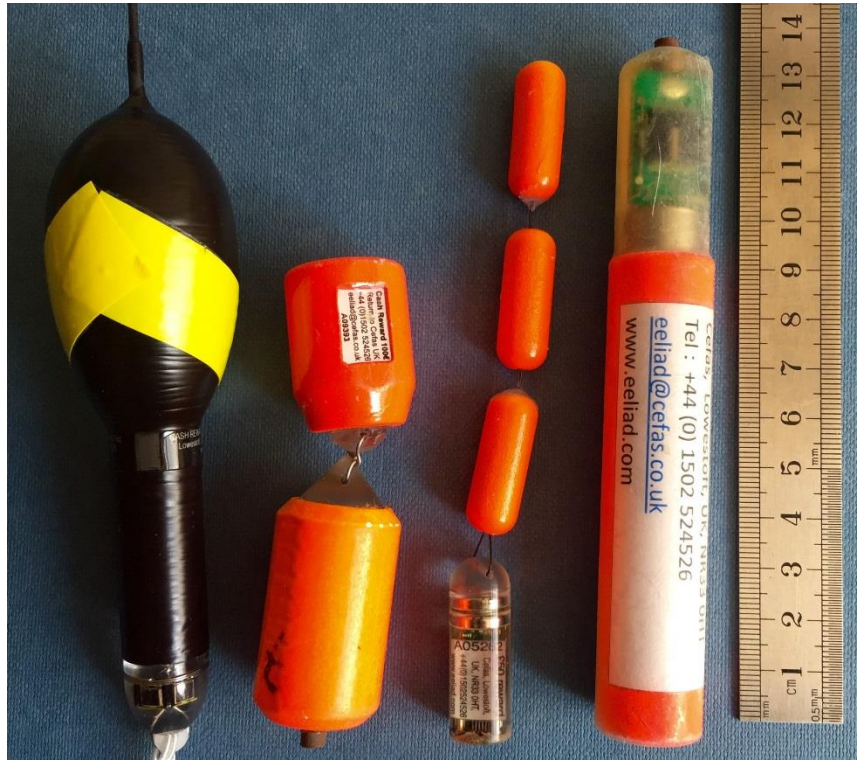

(B)

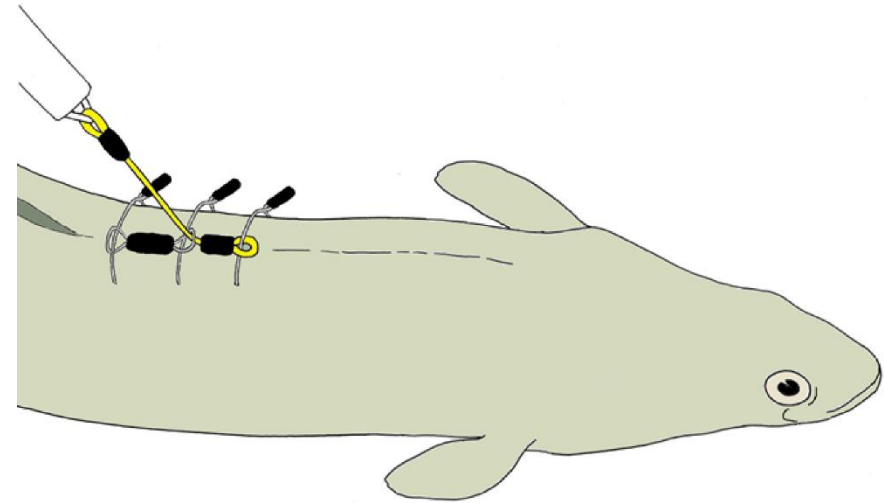

**fig. S7. Electronic tag types and attachment technique.** (a) Tag types used in the study (from left to right): Microwave Telemetry X-tag, Cefas Technology Ltd pop-off archival tag v2, Cefas Technology Ltd internal drift archival tag and Cefas Technology Ltd pop-off archival tag v1; (b) the ‘Westerberg’ tag attachment method. Eel drawing by Lene Jacobsen (DTU-Aqua).

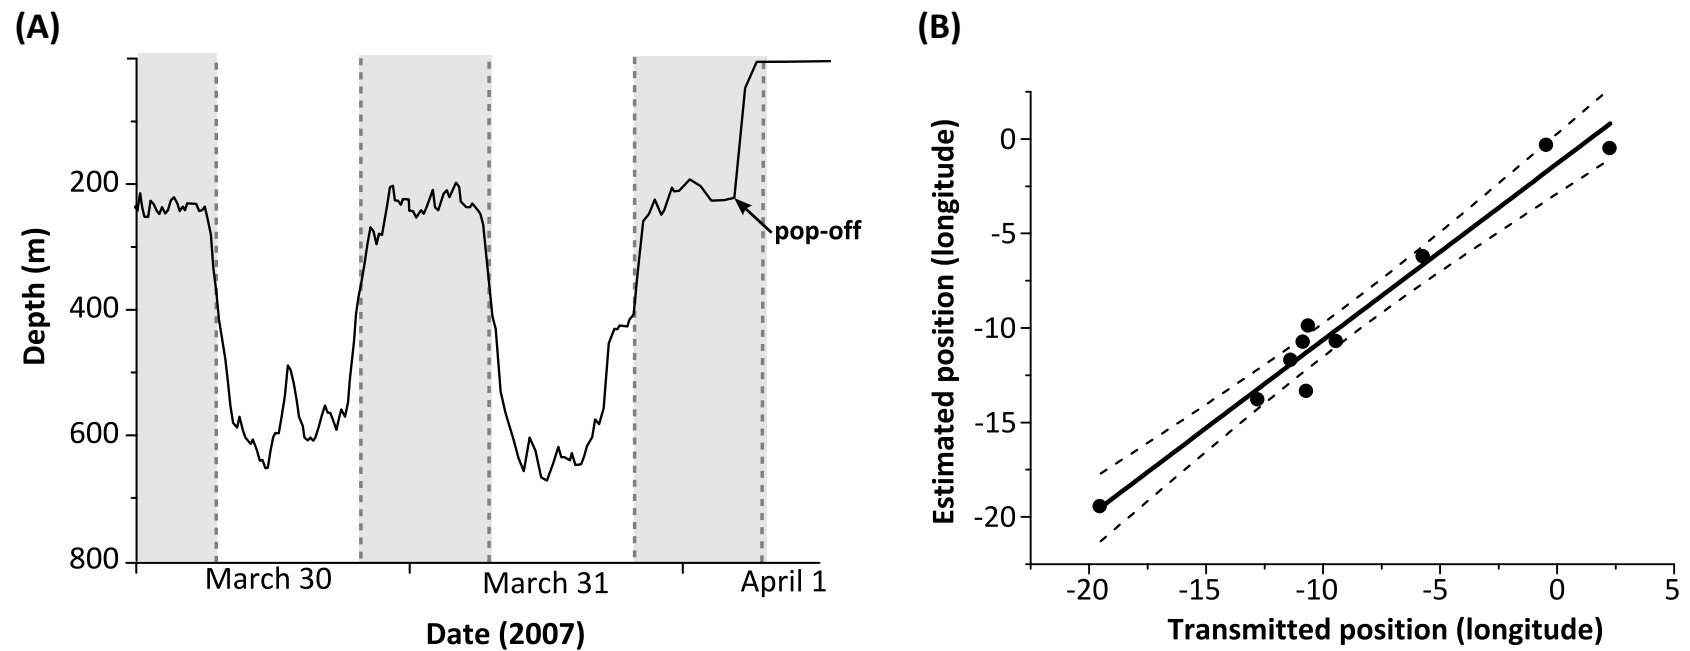

**fig. S8. Principle and validation of behavioral geolocation.** (a) illustration of synchronicity of large vertical movements with dawn and dusk (from tag #71074), shaded areas represent night periods and dashed lines represent dawn and dusk times at the pop-off position; (b) estimated longitude versus transmitted longitude (negative numbers denote degrees west). The solid line shows the fitted linear regression (estimated position=1.03341\*transmitted position+1.02292,  $R^2=0.96$ ,  $F_{1,8}=211.9$ ,  $p<0.001$ ).

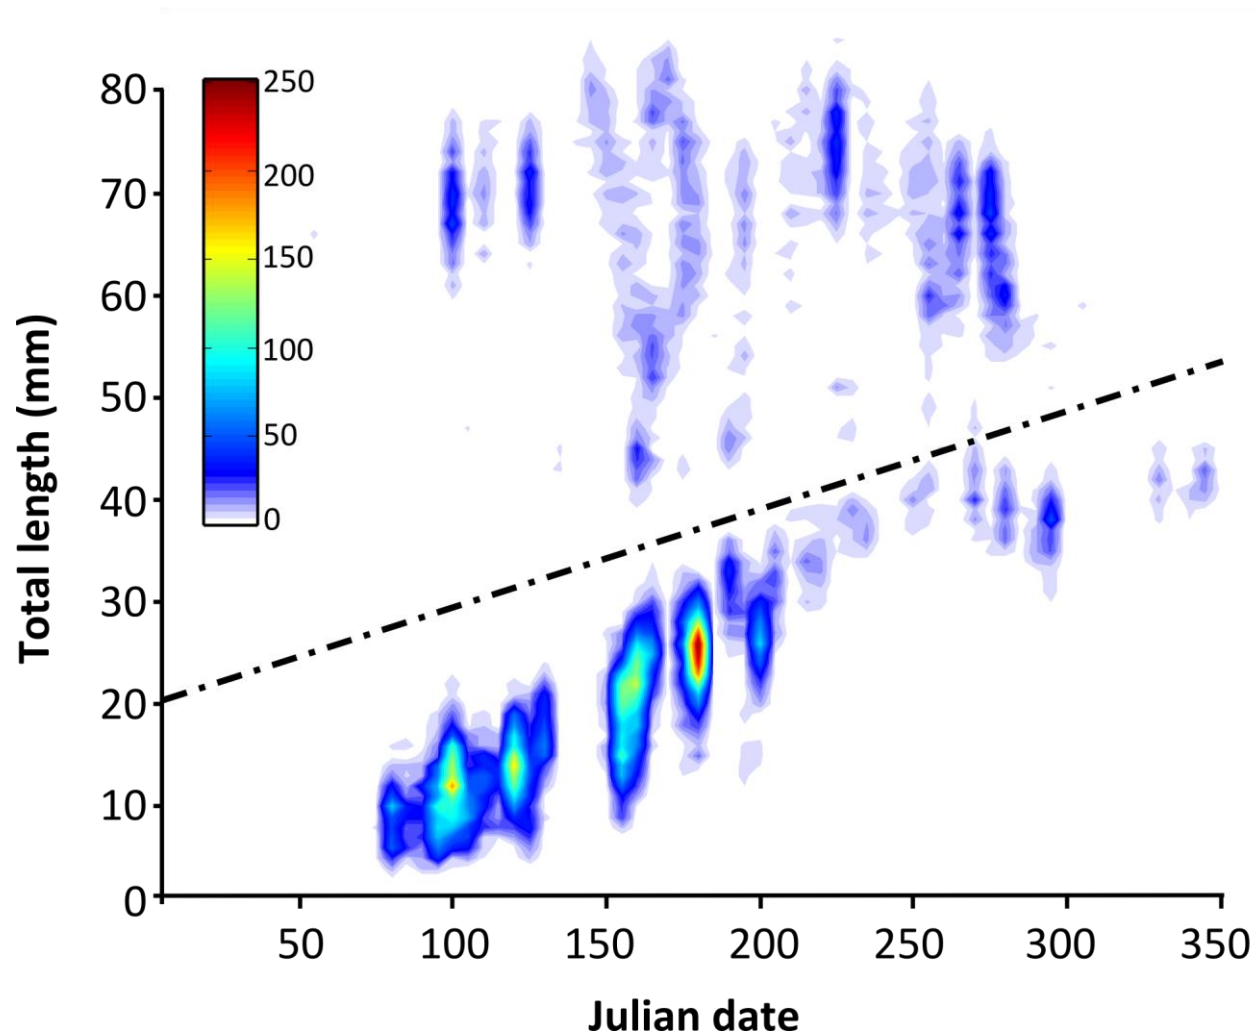

**fig. S9.** Analysis of the total number of length-measured European eel *leptocephali* in the ICES database. Data were binned into 1 mm length and 5 d time bins, then contoured to show the number of larvae within each size bin (legend provides key). The dashed line (given by the equation  $TL = 20.3 + 0.094 \cdot \text{day}$ ) shows the separation between the cohort of the season and individuals born in previous years.

**table S1. Details of reconstructed migrations of eels that reached the ocean.** Tag numbers preceded by ‘A’ are DST tags, whilst all others are PSAT. DST tags marked \* were implanted tags, all others were externally attached. Oceanic speeds were only calculated for those eels that reached the ocean, and for which the full migratory paths could be reconstructed.

| Tag     | Release region | Release location        | Length (m) | Start date | Duration (d) | Path | Distance (full, km) | Speed (full, km d <sup>-1</sup> ) | Distance (oceanic, km) | Speed (oceanic, km d <sup>-1</sup> ) | Fate                |
|---------|----------------|-------------------------|------------|------------|--------------|------|---------------------|-----------------------------------|------------------------|--------------------------------------|---------------------|
| A07235  | Baltic Sea     | Kattegat, Marstrand     | 0.921      | 27/10/2011 | 47           | Full | 602                 | 17.2                              | 412                    | 27.5                                 | Unknown             |
| A07224  | Baltic Sea     | Kattegat, Marstrand     | 0.832      | 27/10/2011 | 58           | Full | 527                 | 9.2                               | 494                    | 12                                   | Pop-off             |
| A06840  | Baltic Sea     | Gullmarenfjord, Lysekil | 0.957      | 12/10/2010 | 55           | Full | 688                 | 12.4                              | 530                    | 35.4                                 | Predation           |
| A06874  | Baltic Sea     | Gullmarenfjord, Lysekil | 0.877      | 13/10/2010 | 58           | Full | 1237                | 21.3                              | 1083                   | 30.9                                 | Pop-off             |
| A06869  | Baltic Sea     | Gullmarenfjord, Lysekil | 0.937      | 12/10/2010 | 58           | Full | 1257                | 21.7                              | 1104                   | 33.5                                 | Pop-off             |
| A06878  | Baltic Sea     | Gullmarenfjord, Lysekil | 0.898      | 13/10/2010 | 58           | Full | 1376                | 23.7                              | 1219                   | 28.4                                 | Pop-off             |
| 111809  | Baltic Sea     | Kattegat, Marstrand     | 0.906      | 27/10/2011 | 157          | Full | 2207                | 14.1                              | 1309                   | 9.4                                  | Pop-off             |
| 111804  | Baltic Sea     | Kattegat, Marstrand     | 0.949      | 27/10/2011 | 98           | Full | 1471                | 15                                | 1375                   | 18.6                                 | Pop-off             |
| A06867  | Baltic Sea     | Øresund, Øresund        | 0.959      | 11/11/2010 | 59           | Full | 1709                | 29                                | 1505                   | 32                                   | Pop-off             |
| 111812  | Baltic Sea     | Kattegat, Marstrand     | 0.853      | 27/10/2011 | 157          | Full | 1795                | 11.4                              | 1603                   | 11.6                                 | Pop-off             |
| 111817  | Baltic Sea     | Kattegat, Marstrand     | 0.974      | 28/10/2011 | 83           | Full | 1738                | 20.9                              | 1621                   | 31.2                                 | Pop-off             |
| A07217  | Baltic Sea     | Kattegat, Marstrand     | 0.916      | 28/10/2011 | 79           | Full | 1737                | 20.7                              | 1648                   | 34.3                                 | Pop-off             |
| A03486* | Baltic Sea     | Øresund, Øresund        | 0.869      | 26/11/2008 | 78           | Full | 1984                | 25.6                              | 1683                   | 24.4                                 | Predation           |
| A06887  | Baltic Sea     | Øresund, Øresund        | 0.962      | 11/11/2010 | 86           | Full | 2056                | 24                                | 1769                   | 24.9                                 | Suspected predation |
| 111815  | Baltic Sea     | Kattegat, Marstrand     | 1.06       | 28/10/2011 | 156          | Full | 2107                | 13.5                              | 1831                   | 13.2                                 | Pop-off             |
| A05427* | Baltic Sea     | Kattegat, Marstrand     | 0.895      | 28/10/2011 | 135          | Full | 1993                | 14.8                              | 1928                   | 18.7                                 | Pop-off             |
| 111814  | Baltic Sea     | Kattegat, Marstrand     | 0.89       | 27/10/2011 | 157          | Full | 2037                | 13                                | 1958                   | 13.9                                 | Pop-off             |
| 111813  | Baltic Sea     | Kattegat, Marstrand     | 0.977      | 27/10/2011 | 157          | Full | 2256                | 14.4                              | 2106                   | 14.4                                 | Pop-off             |
| 111816  | Baltic Sea     | Kattegat, Marstrand     | 1.005      | 28/10/2011 | 156          | Full | 2386                | 15.3                              | 2154                   | 18                                   | Pop-off             |
| A07234  | Baltic Sea     | Kattegat, Marstrand     | 0.78       | 27/10/2011 | 140          | Full | 2366                | 16.9                              | 2333                   | 21.6                                 | Pop-off             |
| A07237  | Baltic Sea     | Kattegat, Marstrand     | 0.917      | 27/10/2011 | 140          | Full | 2488                | 17.8                              | 2337                   | 18.6                                 | Pop-off             |

| Tag     | Release region | Release location                   | Length (m) | Start date | Duration (d) | Path       | Distance (full, km) | Speed (full, km d <sup>-1</sup> ) | Distance (oceanic, km) | Speed (oceanic, km d <sup>-1</sup> ) | Fate                |
|---------|----------------|------------------------------------|------------|------------|--------------|------------|---------------------|-----------------------------------|------------------------|--------------------------------------|---------------------|
| A06884  | Baltic Sea     | Øresund, Øresund                   | 1.038      | 11/11/2010 | 106          | Full       | 2887                | 27.2                              | 2638                   | 26.9                                 | Pop-off             |
| A07228  | Baltic Sea     | Kattegat, Marstrand                | 0.833      | 27/10/2011 | 79           | Full       | 864                 | 10.9                              | na                     | na                                   | Pop-off             |
| A07062  | Bay of Biscay  | La Loire, Ancenis                  | 1.05       | 24/11/2010 | 25           | End to end | 705                 | 28.100                            | na                     | na                                   | Predation           |
| 89306   | Bay of Biscay  | La Loire (offshore), Bay of Biscay | 1.029      | 14/12/2008 | 10           | End to end | 294                 | 30.4                              | na                     | na                                   | Pop-off             |
| 89305   | Bay of Biscay  | La Loire (offshore), Bay of Biscay | 0.983      | 14/12/2008 | 11           | End to end | 151                 | 14.4                              | na                     | na                                   | Predation           |
| 83177   | Bay of Biscay  | La Loire (offshore), Bay of Biscay | 1.114      | 14/12/2008 | 8            | End to end | 261                 | 32.7                              | na                     | na                                   | Suspected predation |
| 83153   | Bay of Biscay  | La Loire (offshore), Bay of Biscay | 1          | 14/12/2008 | 8            | End to end | 342                 | 44.5                              | na                     | na                                   | Suspected predation |
| 83152   | Bay of Biscay  | La Loire (offshore), Bay of Biscay | 1.02       | 14/12/2008 | 7            | End to end | 273                 | 38.1                              | na                     | na                                   | Suspected predation |
| 83151   | Bay of Biscay  | La Loire (offshore), Bay of Biscay | 0.951      | 14/12/2008 | 12           | End to end | 77                  | 6.6                               | na                     | na                                   | Suspected predation |
| 111832  | Celtic Sea     | Galway Bay (offshore)              | 0.905      | 21/11/2011 | 49           | Full       | 1053                | 21.4                              | 610                    | 13.5                                 | Suspected predation |
| 89310   | Celtic Sea     | Corrib, Galway harbour             | 0.968      | 02/12/2008 | 52           | Full       | 1437                | 27.7                              | 830                    | 28.7                                 | Predation           |
| 71076   | Celtic Sea     | Corrib, Galway harbour             | 0.875      | 26/11/2006 | 82           | Full       | 1511                | 18.5                              | 1053                   | 14.6                                 | Pop-off             |
| A07056  | Celtic Sea     | Corrib, Galway harbour             | 0.913      | 13/11/2010 | 40           | Full       | 1714                | 42.5                              | 1195                   | 33.8                                 | Pop-off             |
| A05262* | Celtic Sea     | Corrib, Galway harbour             | 0.833      | 20/10/2009 | 84           | Full       | 1993                | 23.7                              | 1613                   | 26.8                                 | Predation           |
| 71074   | Celtic Sea     | Corrib, Galway harbour             | 0.9        | 26/11/2006 | 126          | Full       | 2928                | 23.2                              | 2440                   | 23.9                                 | Pop-off             |
| 49559   | Celtic Sea     | Corrib, Galway harbour             | 0.926      | 13/11/2010 | 148          | Full       | 4115                | 27.9                              | 3769                   | 28.3                                 | Predation           |
| 83140   | Celtic Sea     | Corrib, Galway harbour             | 0.977      | 04/11/2008 | 273          | Full       | 6982                | 25.6                              | 6709                   | 25.4                                 | Pop-off             |
| 49581   | Celtic Sea     | Corrib, Galway harbour             | 0.922      | 13/11/2010 | 15           | End to end | 559                 | 37.5                              | na                     | na                                   | Pop-off             |
| 71080   | Celtic Sea     | Corrib, Galway harbour             | 0.945      | 25/11/2006 | 20           | End to end | 545                 | 26.6                              | na                     | na                                   | Unknown             |
| 111830  | Celtic Sea     | Galway Bay (offshore)              | 0.865      | 21/11/2011 | 18           | End to end | 415                 | 22.8                              | na                     | na                                   | Predation           |
| 111828  | Celtic Sea     | Galway Bay (offshore)              | 0.98       | 21/11/2011 | 9            | End to end | 283                 | 32.9                              | na                     | na                                   | Predation           |
| 111826  | Celtic Sea     | Galway Bay (offshore)              | 1.015      | 21/11/2011 | 8            | End to end | 285                 | 35.1                              | na                     | na                                   | Unknown             |

| Tag    | Release region | Release location       | Length (m) | Start date | Duration (d) | Path       | Distance (full, km) | Speed (full, km d <sup>-1</sup> ) | Distance (oceanic, km) | Speed (oceanic, km d <sup>-1</sup> ) | Fate                |
|--------|----------------|------------------------|------------|------------|--------------|------------|---------------------|-----------------------------------|------------------------|--------------------------------------|---------------------|
| 111824 | Celtic Sea     | Galway Bay (offshore)  | 1.01       | 21/11/2011 | 8            | End to end | 88                  | 10.8                              | na                     | na                                   | Predation           |
| 111821 | Celtic Sea     | Galway Bay (offshore)  | 0.9        | 21/11/2011 | 10           | End to end | 116                 | 12.2                              | na                     | na                                   | Predation           |
| 111820 | Celtic Sea     | Galway Bay (offshore)  | 0.905      | 21/11/2011 | 8            | End to end | 110                 | 14.7                              | na                     | na                                   | Predation           |
| 101437 | Celtic Sea     | Corrib, Galway harbour | 1.027      | 13/11/2010 | 11           | End to end | 120                 | 11.1                              | na                     | na                                   | Predation           |
| 101424 | Celtic Sea     | Corrib, Galway harbour | 0.897      | 13/11/2010 | 9            | End to end | 96                  | 11                                | na                     | na                                   | Unknown             |
| 89317  | Celtic Sea     | Corrib, Galway harbour | 0.95       | 02/12/2008 | 11           | End to end | 152                 | 14.2                              | na                     | na                                   | Unknown             |
| 89316  | Celtic Sea     | Corrib, Galway harbour | 0.875      | 02/12/2008 | 11           | End to end | 155                 | 14.2                              | na                     | na                                   | Suspected predation |
| 89315  | Celtic Sea     | Corrib, Galway harbour | 1          | 02/12/2008 | 11           | End to end | 120                 | 11.3                              | na                     | na                                   | Suspected predation |
| 89314  | Celtic Sea     | Corrib, Galway harbour | 0.97       | 02/12/2008 | 11           | End to end | 131                 | 11.7                              | na                     | na                                   | Suspected predation |
| 89308  | Celtic Sea     | Corrib, Galway harbour | 0.987      | 02/12/2008 | 13           | End to end | 140                 | 10.6                              | na                     | na                                   | Suspected predation |
| 83173  | Celtic Sea     | Corrib, Galway harbour | 0.922      | 02/12/2008 | 11           | End to end | 132                 | 12.3                              | na                     | na                                   | Pop-off             |
| 83170  | Celtic Sea     | Corrib, Galway harbour | 0.952      | 02/12/2008 | 8            | End to end | 178                 | 22.2                              | na                     | na                                   | Suspected predation |
| 83167  | Celtic Sea     | Corrib, Galway harbour | 0.987      | 02/12/2008 | 16           | End to end | 593                 | 37.7                              | na                     | na                                   | Suspected predation |
| 83159  | Celtic Sea     | Corrib, Galway harbour | 1.03       | 02/12/2008 | 8            | End to end | 84                  | 10.9                              | na                     | na                                   | Suspected predation |
| 83156  | Celtic Sea     | Corrib, Galway harbour | 1.038      | 02/12/2008 | 11           | End to end | 284                 | 26.3                              | na                     | na                                   | Suspected predation |
| 83142  | Celtic Sea     | Corrib, Galway harbour | 0.904      | 04/11/2008 | 9            | End to end | 195                 | 22.8                              | na                     | na                                   | Unknown             |
| 83139  | Celtic Sea     | Corrib, Galway harbour | 0.953      | 04/11/2008 | 15           | End to end | 171                 | 11.8                              | na                     | na                                   | Suspected predation |
| 83136  | Celtic Sea     | Corrib, Galway harbour | 0.911      | 04/11/2008 | 9            | End to end | 125                 | 14.3                              | na                     | na                                   | Predation           |
| 83135  | Celtic Sea     | Corrib, Galway harbour | 0.971      | 04/11/2008 | 10           | End to end | 115                 | 12.1                              | na                     | na                                   | Suspected predation |
| 83129  | Celtic Sea     | Corrib, Galway harbour | 1.032      | 04/11/2008 | 13           | End to end | 129                 | 9.8                               | na                     | na                                   | Suspected predation |
| 83124  | Celtic Sea     | Corrib, Galway harbour | 1.008      | 04/11/2008 | 14           | End to end | 130                 | 9.1                               | na                     | na                                   | Suspected predation |
| 83121  | Celtic Sea     | Corrib, Galway harbour | 0.995      | 04/11/2008 | 10           | End to end | 133                 | 13.3                              | na                     | na                                   | Predation           |

| Tag    | Release region        | Release location         | Length (m) | Start date | Duration (d) | Path       | Distance (full, km) | Speed (full, km d <sup>-1</sup> ) | Distance (oceanic, km) | Speed (oceanic, km d <sup>-1</sup> ) | Fate                |
|--------|-----------------------|--------------------------|------------|------------|--------------|------------|---------------------|-----------------------------------|------------------------|--------------------------------------|---------------------|
| 83111  | Celtic Sea            | Corrib, Galway harbour   | 1.094      | 04/11/2008 | 17           | End to end | 229                 | 13.7                              | na                     | na                                   | Unknown             |
| 71086  | Celtic Sea            | Corrib, Galway harbour   | 1.02       | 25/11/2006 | 30           | End to end | 879                 | 29.2                              | na                     | na                                   | Suspected predation |
| 71085  | Celtic Sea            | Corrib, Galway harbour   | 0.945      | 25/11/2006 | 11           | End to end | 238                 | 22.3                              | na                     | na                                   | Unknown             |
| 71077  | Celtic Sea            | Corrib, Galway harbour   | 1.005      | 25/11/2006 | 9            | End to end | 148                 | 16.2                              | na                     | na                                   | Pop-off             |
| 71075  | Celtic Sea            | Corrib, Galway harbour   | 1.06       | 26/11/2006 | 36           | End to end | 260                 | 7.3                               | na                     | na                                   | Pop-off             |
| 71072  | Celtic Sea            | Corrib, Galway harbour   | 0.93       | 26/11/2006 | 18           | End to end | 294                 | 16.2                              | na                     | na                                   | Pop-off             |
| 71071  | Celtic Sea            | Corrib, Galway harbour   | 0.98       | 27/10/2006 | 8            | End to end | 270                 | 32.2                              | na                     | na                                   | Predation           |
| 49644  | Celtic Sea            | Corrib, Galway harbour   | 1.022      | 13/11/2010 | 7            | End to end | 294                 | 40.2                              | na                     | na                                   | Predation           |
| 49426  | Celtic Sea            | Corrib, Galway harbour   | 0.973      | 13/11/2010 | 8            | End to end | 382                 | 47.2                              | na                     | na                                   | Unknown             |
| A09424 | North Sea             | Elbe, Glückstadt         | 0.77       | 28/11/2012 | 27           | Full       | 155                 | 12.9                              | na                     | na                                   | Pop-off             |
| A09411 | North Sea             | Eider, Reimersbude       | 0.804      | 13/10/2012 | 12           | Full       | 349                 | 29.1                              | na                     | na                                   | Pop-off             |
| A09377 | North Sea             | Eider, Reimersbude       | 0.845      | 26/10/2012 | 33           | Full       | 675                 | 19.9                              | na                     | na                                   | Pop-off             |
| A09393 | North Sea             | Elbe, Wedel              | 0.714      | 14/11/2012 | 33           | Full       | 695                 | 21.1                              | na                     | na                                   | Pop-off             |
| A09374 | North Sea             | Elbe, Wedel              | 0.762      | 15/11/2012 | 34           | Full       | 794                 | 24.1                              | na                     | na                                   | Pop-off             |
| 133986 | western Mediterranean | Port-La-Nouvelle, France | 0.918      | 10/12/2013 | 181          | Full       | 2296                | 12.7                              | 928                    | 7.4                                  | Pop-off             |
| 133980 | western Mediterranean | Port-La-Nouvelle, France | 0.908      | 09/12/2013 | 107          | Full       | 1642                | 15.3                              | 1249                   | 21.8                                 | Predation           |
| 133979 | western Mediterranean | Port-La-Nouvelle, France | 0.952      | 09/12/2013 | 183          | Full       | 2157                | 11.8                              | 1905                   | 14.4                                 | Pop-off             |
| 133985 | western Mediterranean | Port-La-Nouvelle, France | 0.987      | 10/12/2013 | 181          | End to end | 719                 | 4.0                               | na                     | na                                   | Pop-off             |
| 133984 | western Mediterranean | Port-La-Nouvelle, France | 0.865      | 09/12/2013 | 33           | End to end | 240                 | 7.4                               | na                     | na                                   | Predation           |
| 133983 | western Mediterranean | Port-La-Nouvelle, France | 0.998      | 09/12/2013 | 110          | End to end | 992                 | 9.0                               | na                     | na                                   | Predation           |
| 133982 | western Mediterranean | Port-La-Nouvelle, France | 0.96       | 09/12/2013 | 144          | End to end | 636                 | 4.4                               | na                     | na                                   | Predation           |
| 133981 | western Mediterranean | Port-La-Nouvelle, France | 0.934      | 09/12/2013 | 88           | End to end | 1053                | 12.0                              | na                     | na                                   | Predation           |



**table S2. Assessment of effect of tag and release country on speed, migration duration, and migration distance of eels.**

| <b>Speed over ground</b> | <b>Df</b> | <b>Sum squares</b> | <b>Mean square</b> | <b>F value</b> | <b>Pr (&gt;F)</b> |
|--------------------------|-----------|--------------------|--------------------|----------------|-------------------|
| Tag Type                 | 1         | 103.8              | 103.774            | 1.0603         | 0.3061            |
| Location                 | 1         | 4.4                | 4.413              | 0.0451         | 0.8324            |
| Tag type*location        | 1         | 3.6                | 3.582              | 0.0366         | 0.8487            |
| Residuals                | 83        | 8123.4             | 97.872             |                |                   |

  

| <b>Duration</b>   | <b>Df</b> | <b>Sum squares</b> | <b>Mean square</b> | <b>F value</b> | <b>Pr (&gt;F)</b> |
|-------------------|-----------|--------------------|--------------------|----------------|-------------------|
| Tag Type          | 1         | 3287               | 3286.9             | 0.9588         | 0.33033           |
| Location          | 1         | 834                | 833.5              | 0.2431         | 0.62325           |
| Tag type*location | 1         | 13900              | 13900.3            | 4.0549         | 0.04728           |
| Residuals         | 83        | 284527             | 3428               |                |                   |

  

| <b>Distance</b>   | <b>Df</b> | <b>Sum squares</b> | <b>Mean square</b> | <b>F value</b> | <b>Pr (&gt;F)</b> |
|-------------------|-----------|--------------------|--------------------|----------------|-------------------|
| Tag Type          | 1         | 4444710            | 4444710            | 3.9113         | 0.05128           |
| Location          | 1         | 1025430            | 1025430            | 0.9024         | 0.34490           |
| Tag type*location | 1         | 2585178            | 2585178            | 2.2750         | 0.13528           |
| Residuals         | 83        | 94318347           | 1136366            |                |                   |

**table S3. The speed of European eels.** The migration speed or swimming speed values taken from literature used to compare to the migration speeds observed in this study. Citations are listed in the full paper.

| <b>Tag type</b> | <b>Type of study</b> | <b>Speed (km d<sup>-1</sup>)</b> | <b>Citation number</b> |
|-----------------|----------------------|----------------------------------|------------------------|
| Ultrasonic      | Field                | 36                               | 67                     |
| Ultrasonic      | Field                | 13                               | 65                     |
| Ultrasonic      | Field                | 15                               | 62                     |
| Ultrasonic      | Field                | 16                               | 65                     |
| Ultrasonic      | Field                | 16                               | 66                     |
| Ultrasonic      | Field                | 25                               | 69                     |
| Ultrasonic      | Field                | 25                               | 64                     |
| Ultrasonic      | Field                | 27                               | 68                     |
| Archival        | Field                | 31                               | 14                     |
| Unencumbered    | Laboratory           | 32                               | 76                     |
| Unencumbered    | Laboratory           | 32                               | 11                     |
| Unencumbered    | Laboratory           | 35                               | 71                     |
| Unencumbered    | Laboratory           | 43                               | 74                     |
| Unencumbered    | Laboratory           | 31                               | 70                     |
| Unencumbered    | Laboratory           | 43                               | 72                     |
| Unencumbered    | Laboratory           | 59                               | 75                     |
| Unencumbered    | Laboratory           | 55                               | 73                     |

**table S4a.** The fate of eels that reached oceanic waters. Datasets recovered from eels tagged in Spain (n=5) are not included.

|                              | Release location |            |          |           |           | Total     |
|------------------------------|------------------|------------|----------|-----------|-----------|-----------|
|                              | Bay of Biscay    | Celtic Sea | Med. Sea | North Sea | Baltic    |           |
| <b>Pop-off</b>               |                  |            |          |           |           |           |
| Premature                    | 1                | 7          | 0        | 2         | 2         | 10        |
| Scheduled                    | 0                | 2          | 3        | 1         | 17        | 27        |
| <b>Predation</b>             |                  |            |          |           |           |           |
| Strong evidence of predation | 2                | 13         | 5        | 1         | 2         | 22        |
| Suspected pelagic predation  | 4                | 9          | 0        | 0         | 1         | 14        |
| Suspected benthic predation  | 0                | 5          | 0        | 0         | 0         | 5         |
| Caught by fisherman          | 0                | 0          | 0        | 1         | 0         | 0         |
| <b>Unknown</b>               | <b>0</b>         | <b>8</b>   | <b>0</b> | <b>0</b>  | <b>0</b>  | <b>8</b>  |
| <b>Grand Total</b>           | <b>7</b>         | <b>45</b>  | <b>8</b> | <b>5</b>  | <b>22</b> | <b>87</b> |

**table S4b.** The fate of all released eels for which data sets were recovered. Data sets recovered from eels tagged in Spain (5) are not included.  
 \*(includes 14 eels that didn't leave Lake Malaren)

|                                                | Release location |            |          |           |           | Total     |
|------------------------------------------------|------------------|------------|----------|-----------|-----------|-----------|
|                                                | Bay of Biscay    | Celtic Sea | Med. Sea | North Sea | Baltic    |           |
| <b>Pop-off</b>                                 |                  |            |          |           |           |           |
| Premature                                      | 1                | 9          | 0        | 12        | 2         | 24        |
| Scheduled                                      | 1                | 2          | 2        | 3         | 17        | 27        |
| <b>Predation</b>                               |                  |            |          |           |           |           |
| Strong evidence of predation                   | 13               | 19         | 5        | 1         | 1         | 38        |
| Suspected pelagic predation                    | 16               | 36         | 0        | 0         | 3         | 55        |
| Suspected benthic predation                    | 1                | 8          | 0        | 0         | 1         | 10        |
| Caught by fisherman/ found at release location | 3                | 1          | 0        | 1         | 16        | 30        |
| <b>Unknown</b>                                 | 4                | 17         | 0        | 0         | 8         | 29        |
| <b>Grand Total</b>                             | <b>7</b>         | <b>45</b>  | <b>8</b> | <b>5</b>  | <b>22</b> | <b>87</b> |

**table S5. Summary of literature used to assess escapement date.** Eel escapement was assessed by month, for all months of the year unless stated otherwise.

| Country | Catchment               | Latitude (N) | Km to Sargasso | Study period | Estimation method | Location in catchment         | Fishery dependent? | % escaping Sept. to Dec | Citation                 |
|---------|-------------------------|--------------|----------------|--------------|-------------------|-------------------------------|--------------------|-------------------------|--------------------------|
| Spain   | Ulla rio                | 42.43        | 5100           | 1999-2011    | fish trap         | 40 km from the river mouth    | No                 | 78.3                    | Cobo et al 2014          |
| France  | Nive, barrage Halsou    | 43.24        | 5600           | 1999 & 2001  | silver eel trap   | 23 km from the sea            | No                 | 100                     | Gosset et al., 2005      |
| France  | Fumemorte, Camargue     | 43.3         | 6600           | 2001-2007    | fyke nets         | 25 km from the sea            | No                 | 46.3                    | Crivelli, unpubl. data.  |
| France  | Loire, Varades          | 47.23        | 5600           | 1987-2006    | fishing gear      | 130 km from the sea           | Yes (Sept to Feb)  | 98                      | Acou et al, 2009         |
| France  | Fremur                  | 48.34        | 5600           | 1996-2004    | silver eel trap   | 5 km from the sea             | No                 | 43.5                    | Acou et al., 2008        |
| France  | Oir                     | 48.37        | 5600           | 2000-2005    | silver eel trap   | 10 km from the sea            | No                 | 99.8                    | Trancart et al., 2013    |
| Ireland | lower Shannon           | 52.5         | 5300           | 1965-1987    | fishing gear      | Not known                     | Yes                | 77.3                    | Moriarty, 1990           |
| Ireland | Burrishoole             | 53.55        | 5300           | 1985-1988    | silver eel trap   | 5 km from the sea             | No                 | 94.8                    | Poole et al 1990         |
| Germany | Schwentine              | 54.17        | 7500           | 2009-2011    | silver eel trap   | 9 km upstream the river mouth | No                 | 66.9                    | Marohn et al 2014        |
| Germany | Warnow                  | 54.3         | 7500           | 2008-2011    | stow nets         | River mouth                   | No                 | 37.4                    | Reckordt et al., 2014    |
| UK      | Windermere, Cunsey Beck | 54.4         | 5800           | 1940-1944    | silver eel trap   | 30 km from the sea            | No                 | 61.4                    | Frost, 1945              |
| Ireland | lower Bann, Lough Neagh | 54.75        | 5500           | 1961-1969    | fishing gear      | 55 km from the sea            | Yes (June to Dec)  | 90.6                    | Parsons et al, 1977      |
| Sweden  | Baltic Sea ICES 40G4    | 55.75        | 7450           | 1999-2007    | silver eel trap   | coastal fishery               | No                 | 84.5                    | Swedish catch statistics |

| <b>Country</b> | <b>Catchment</b>     | <b>Latitude (N)</b> | <b>Km to Sargasso</b> | <b>Study period</b> | <b>Estimation method</b> | <b>Location in catchment</b> | <b>Fishery dependent?</b> | <b>% escaping Sept. to Dec</b> | <b>Citation</b>                |
|----------------|----------------------|---------------------|-----------------------|---------------------|--------------------------|------------------------------|---------------------------|--------------------------------|--------------------------------|
| Denmark        | Gudena               | 56.21               | 6000                  | 2006                | PIT tagging              | River mouth                  | No                        | 61                             | Jepsen & Pedersen, unpublished |
| Sweden         | Baltic Sea ICES 41G2 | 56.25               | 7140                  | 1999-2006           | silver eel trap          | coastal fishery              | No                        | 85.5                           | Swedish catch statistics       |
| Sweden         | Baltic Sea ICES 42G6 | 56.75               | 7600                  | 1999-2008           | silver eel trap          | coastal fishery              | No                        | 55.6                           | Swedish catch statistics       |
| Scotland       | Girnock Burn, Dee    | 57.18               | 6100                  | 1967-1981           | silver eel trap          | 70 km from the tidal limit   | No                        | 53.6                           | Chadwick et al, 2007           |
| Sweden         | Baltic Sea ICES 45G6 | 58.25               | 7800                  | 1999-2009           | silver eel trap          | coastal fishery              | No                        | 23.8                           | Swedish catch statistics       |
| Norway         | Imsa                 | 58.58               | 6500                  | 1975-1981           | silver eel trap          | trap located at the outlet   | No                        | 94.1                           | Hvidsten, 1985                 |
| Norway         | Halselva             | 70.2                | 7200                  | 2000-2010           | wolf trap                | 200 m from the river mouth   | No                        | 82.3                           | Davidsen et al., 2011          |

**table S6. Silver eel escapement timing in the River Gudena, Denmark.** Eels were implanted with PIT tags in September 2006 at a permanent eel trap at Vestbirk hydropower station, and detected at a downstream receiver station situated at Tange hydropower station, approximately 55 km downstream. A total of 219 eels were detected. Details of the experimental sites can be found in (55).

| <b>Month</b> | <b>Proportion of detections (%)</b> |
|--------------|-------------------------------------|
| September    | 0.9                                 |
| October      | 4.1                                 |
| November     | 15.1                                |
| December     | 32                                  |
| January      | 26                                  |
| February     | 0.0                                 |
| March        | 0.9                                 |
| April        | 5.5                                 |
| May          | 7.8                                 |
| June         | 5.0                                 |
| July         | 2.7                                 |
| August       | 0.0                                 |

**table S7. Release locations and numbers of eels released during the study.**

| <b>River and location</b>          | <b>Latitude</b> | <b>Longitude</b> | <b>Country</b> | <b>Ecoregion</b>      | <b>Number</b> |
|------------------------------------|-----------------|------------------|----------------|-----------------------|---------------|
| Gullmarenfjord, Lysekil            | 58.42           | 11.65            | Sweden         | Baltic Sea            | 50            |
| The Idefjord, Krokstrand           | 59.00           | 11.43            | Sweden         | Baltic Sea            | 20            |
| Kattegat, Marstrand                | 57.89           | 11.58            | Sweden         | Baltic Sea            | 49            |
| Øresund, Øresund                   | 56.24           | 12.55            | Sweden         | Baltic Sea            | 69            |
| La Loire, Ancenis                  | 47.63           | -1.18            | France         | Bay of Biscay         | 31            |
| La Loire (offshore), Bay of Biscay | 46.92           | -2.93            | France         | Bay of Biscay         | 86            |
| Galway Bay (offshore)              | 53.32           | -10              | Ireland        | Celtic Sea            | 181           |
| Corrib, Galway harbour             | 53.21           | -9.19            | Ireland        | Celtic Sea            | 57            |
| Eider, Reimersbude                 | 54.38           | 9.01             | Germany        | North Sea             | 30            |
| Elbe, Wedel                        | 53.57           | 9.7              | Germany        | North Sea             | 14            |
| Elbe, Glückstadt                   | 53.79           | 9.4              | Germany        | North Sea             | 9             |
| Elbe, Winsen                       | 53.4            | 10.17            | Germany        | North Sea             | 22            |
| Port-La-Nouvelle                   | 43.01           | 3.06             | France         | Western Mediterranean | 23            |
| Albufera, Valencia                 | 39.31           | -0.29            | Spain          | Western Mediterranean | 66            |
| <b>Total</b>                       |                 |                  |                |                       | <b>707</b>    |



**table S8.**

**a.** Summary metrics of tagged eels. All values are means ( $\pm$  one standard deviation). Fat content was not measured in eels tagged in Germany.

| Ecoregion             | i-DST      | e-DST      | PSAT       | Total      | N back     | Length (mm)                    | Weight (g)                       | Fat (%)                          | Pankhurst   | Fin index  |
|-----------------------|------------|------------|------------|------------|------------|--------------------------------|----------------------------------|----------------------------------|-------------|------------|
| North Sea             | 0          | 75         | 0          | 75         | 17         | 771 $\pm$ 61                   | 929 $\pm$ 290                    |                                  | 11.1        | 5.2        |
| Bay of Biscay         | 65         | 16         | 36         | 117        | 38         | 988 $\pm$ 44                   | 1961 $\pm$ 241                   | 20.1 $\pm$ 2.0                   | 11.8        | 4.7        |
| Celtic Sea            | 20         | 119        | 98         | 237        | 92         | 919 $\pm$ 73                   | 1635 $\pm$ 444                   | 20.5 $\pm$ 2.4                   | 11.1        | 4.6        |
| Western Mediterranean | 76         | 5          | 8          | 89         | 8          | 830 $\pm$ 68                   | 1289 $\pm$ 361                   | 20.3 $\pm$ 2.4                   | 10.95       | 5.0        |
| Baltic Sea            | 74         | 100        | 15         | 189        | 48         | 922 $\pm$ 66                   | 1601 $\pm$ 359                   | 24.0 $\pm$ 2.3                   | 9.8         | 4.8        |
| <b>Total</b>          | <b>115</b> | <b>435</b> | <b>157</b> | <b>707</b> | <b>206</b> | <b>904 <math>\pm</math> 90</b> | <b>1564 <math>\pm</math> 464</b> | <b>21.0 <math>\pm</math> 2.7</b> | <b>10.8</b> | <b>4.8</b> |

**b.** Summary metrics of eels for which migratory data were recovered ( $\pm$  1 SD). Fat content was not measured in eels tagged in Germany.

| Location              | Total     | PSAT      | Length (mm)                    | Weight (g)                       | Fat (%)                          | Pankhurst   | Fin index  |
|-----------------------|-----------|-----------|--------------------------------|----------------------------------|----------------------------------|-------------|------------|
| North Sea             | 5         | 0         | 779 $\pm$ 49                   | 954 $\pm$ 232                    |                                  | 11.9        | 5.2        |
| Bay of Biscay         | 7         | 6         | 1021 $\pm$ 52                  | 2132 $\pm$ 236                   | 20.1 $\pm$ 1.4                   | 13.2        | 4.7        |
| Celtic Sea            | 44        | 42        | 961 $\pm$ 57                   | 1992 $\pm$ 339                   | 20.1 $\pm$ 2.7                   | 11.8        | 4.8        |
| Western Mediterranean | 8         | 8         | 940 $\pm$ 44                   | 1900 $\pm$ 393                   | 16.5 $\pm$ 0.9                   | 12.7        | 5.0        |
| Baltic Sea            | 23        | 8         | 922 $\pm$ 67                   | 1599 $\pm$ 361                   | 23.6 $\pm$ 2.0                   | 10.3        | 4.9        |
| <b>Grand Total</b>    | <b>87</b> | <b>65</b> | <b>944 <math>\pm</math> 75</b> | <b>1831 <math>\pm</math> 433</b> | <b>20.7 <math>\pm</math> 3.2</b> | <b>11.5</b> | <b>4.8</b> |

**table S9. Metrics of all eels tagged ( $n = 707$ ).** Provided separately as an excel file (708 rows x 10 columns).
